# Supplementary material for: Esterase-Sensitive Prodrugs of a Potent Bisubstrate Inhibitor of Nicotinamide N-Methyltransferase (NNMT) Display Cellular Activity
Source: MDPI journal article supplement (doi:10.3390/biom11091357), 2021-09-14

Supplementary Information for:

# Esterase-Sensitive Prodrugs of a Potent Bisubstrate Inhibitor of Nicotinamide N-Methyltransferase (NNMT) Display Cellular Activity

Matthijs J. van Haren<sup>1,†,\*</sup>, Yongzhi Gao<sup>1,†</sup>, Ned Buijs<sup>1</sup>, Roberto Campagna<sup>2,3</sup>, Davide Sartini<sup>2</sup>, Monica Emanuelli<sup>2</sup>, Lukasz Mateuszuk<sup>3</sup>, Agnieszka Kij<sup>3</sup>, Stefan Chlopicki<sup>3,4</sup>, Pol Escudé Martinez de Castilla<sup>5</sup>, Raymond Schiffelers<sup>5</sup>, Nathaniel I. Martin<sup>1,\*</sup>

1 Biological Chemistry Group, Institute of Biology Leiden, Leiden University, Sylviusweg 72, 2333 BE Leiden, The Netherlands.

2 Department of Clinical Sciences, Università Politecnica delle Marche, Via Ranieri 65, 60131, Ancona, Italy.

3 Jagiellonian University, Jagiellonian Centre for Experimental Therapeutics (JCET), Bobrzynskiego 14, 30-348 Krakow, Poland.

4 Jagiellonian University Medical College, Faculty of Medicine, Chair of Pharmacology, Grzegorzeczka 16, 31-531 Krakow, Poland

5 Department of Clinical Chemistry and Haematology, Universitair Medisch Centrum Utrecht, Heidelberglaan 100, 3584 CX Utrecht, The Netherlands.

\* Correspondence: m.j.van.haren@biology.leidenuniv.nl, n.i.martin@biology.leidenuniv.nl

† These authors contributed equally to this work.

## Table of contents

|                   |    |
|-------------------|----|
| Cellular MNA data | S2 |
| NMR spectra       | S3 |

## Cellular MNA data

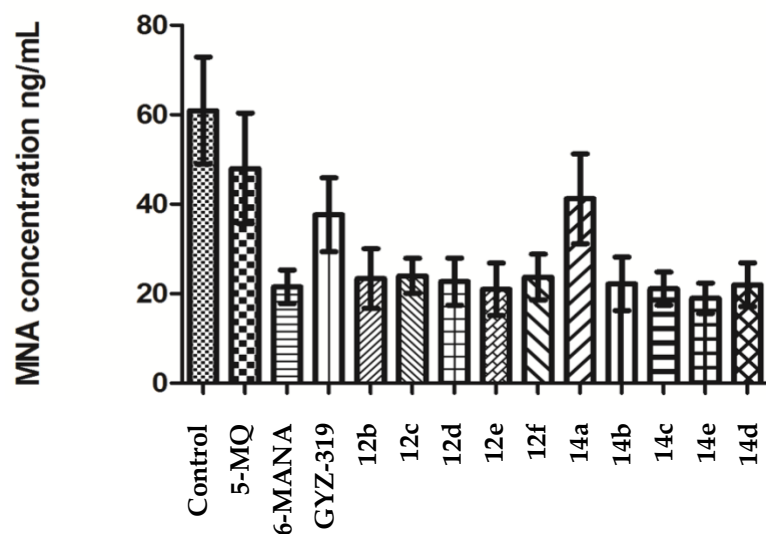

**Figure S1.** 1-methylnicotinamide (MNA) concentrations in endothelial HMEC-1 cells after 24-hour incubation with 10  $\mu$ M of reference compounds 5-amino-methylquinolinium (5-MQ), 6-methylamino-nicotinamide (6-MANA), parent compound GYZ-319 or prodrug compounds **12b-f** and **14a-e**.

# NMR spectra

Compound **3e**  $^1\text{H}$  NMR (400 MHz,  $\text{CDCl}_3$ )

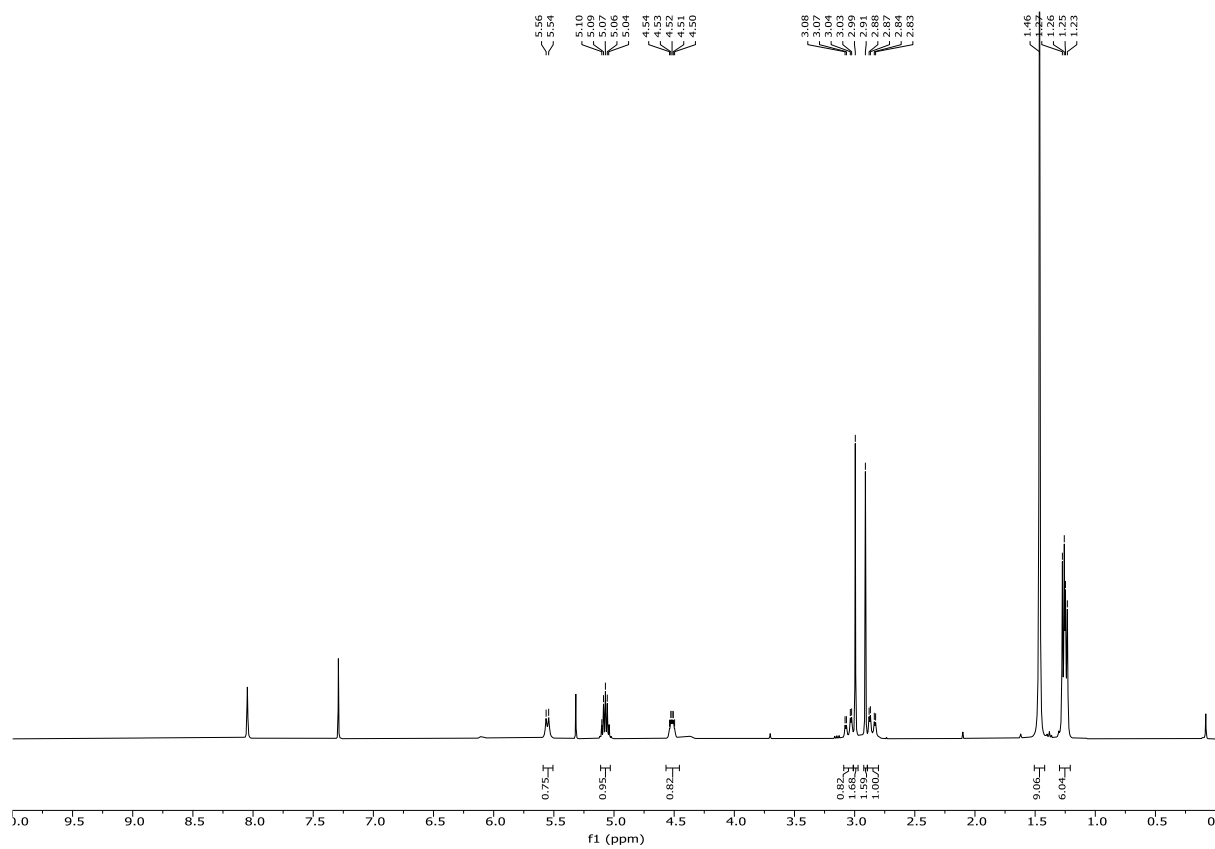

$^{13}\text{C}$  NMR (101 MHz,  $\text{CDCl}_3$ )

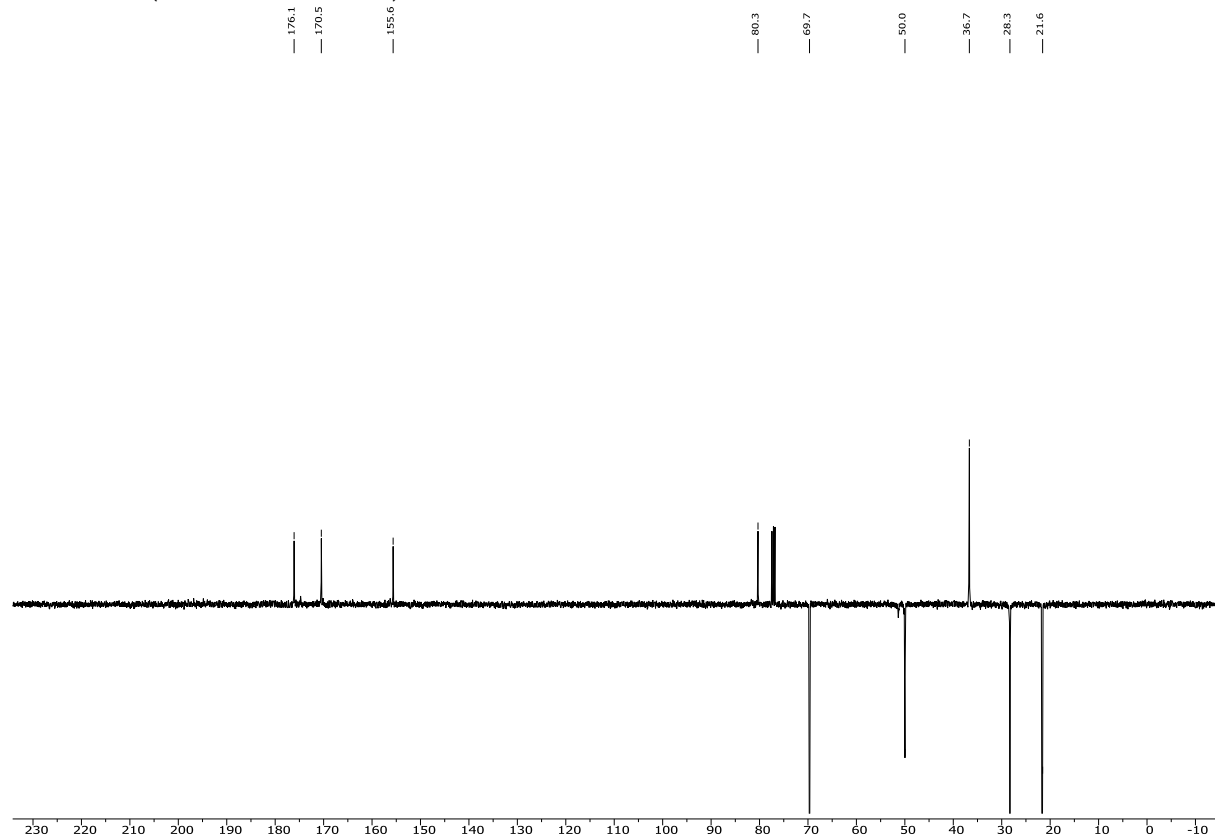

Compound **4d**  $^1\text{H}$  NMR (400 MHz,  $\text{CDCl}_3$ )

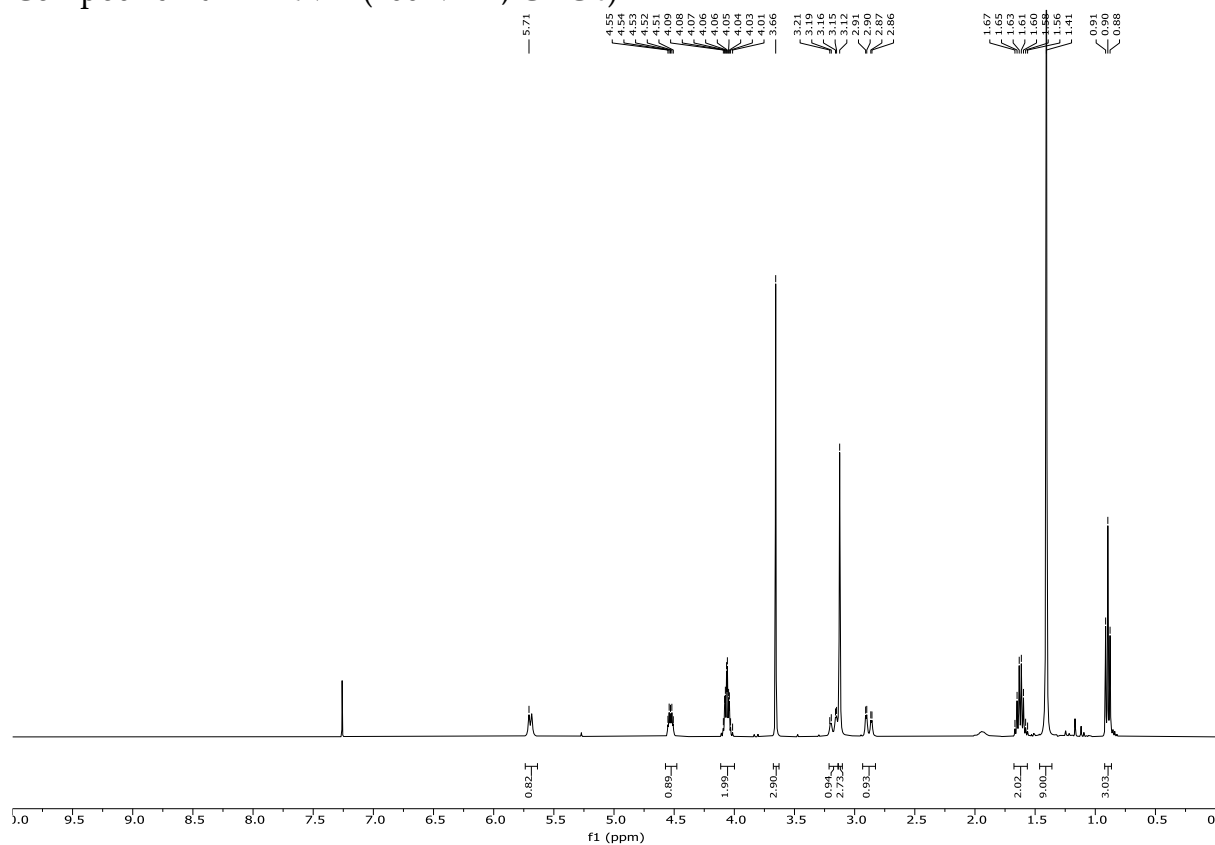

$^{13}\text{C}$  NMR (101 MHz,  $\text{CDCl}_3$ )

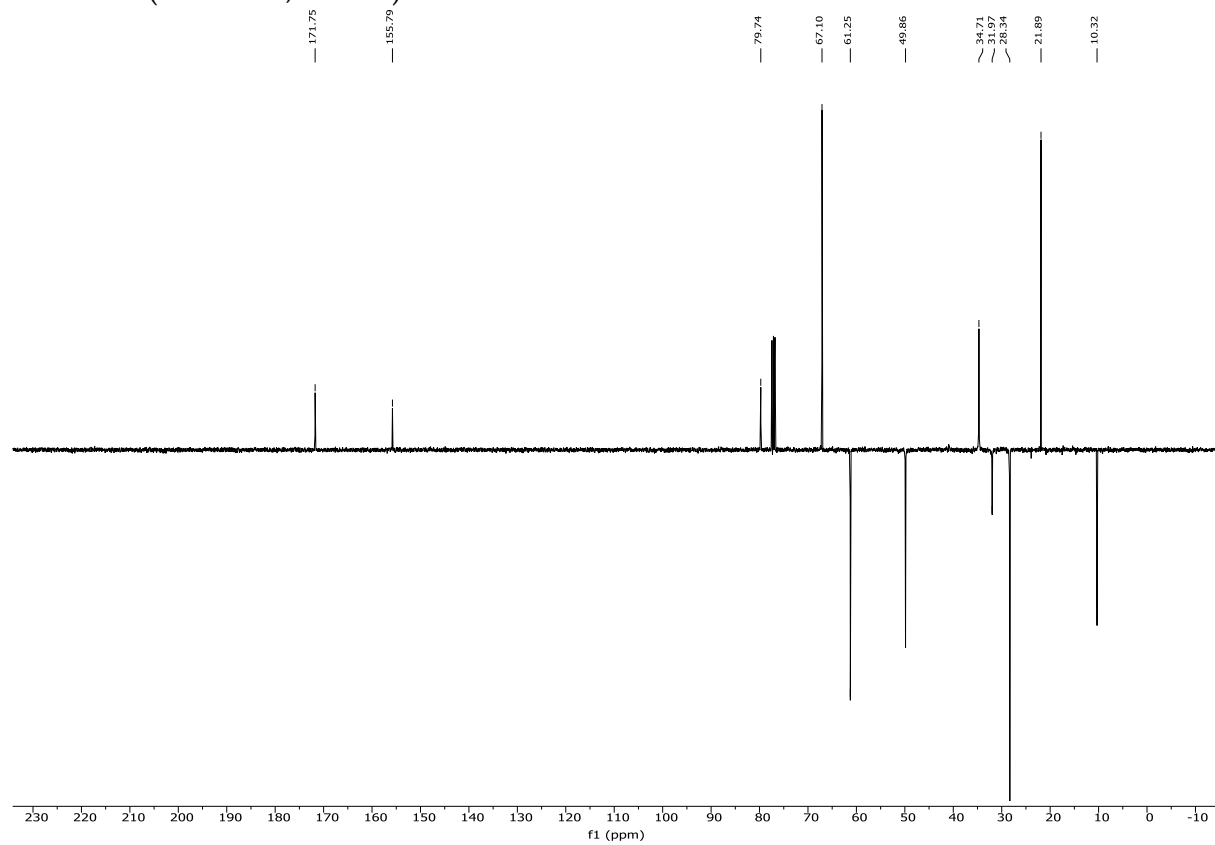

Compound **4e**  $^1\text{H}$  NMR (400 MHz,  $\text{CDCl}_3$ )

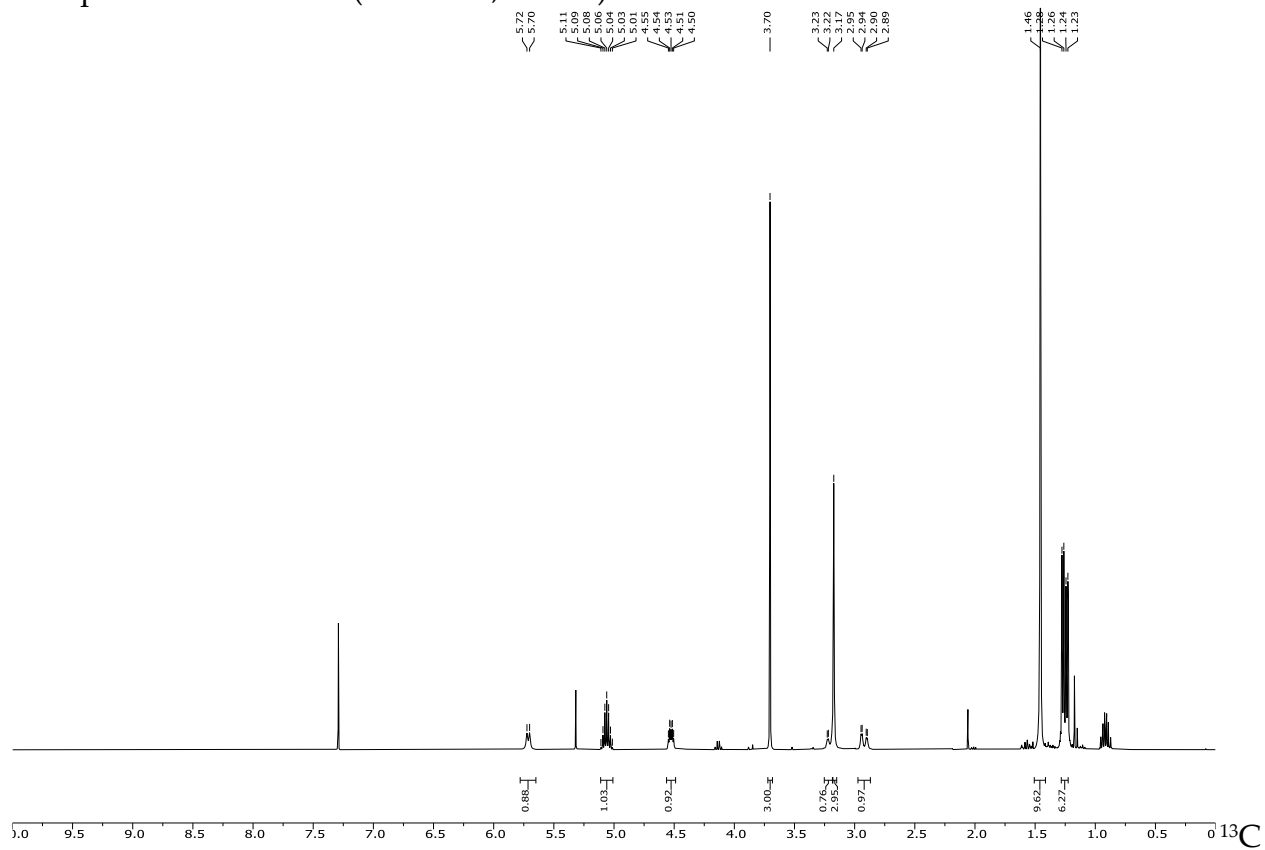

$^{13}\text{C}$  NMR (101 MHz,  $\text{CDCl}_3$ )

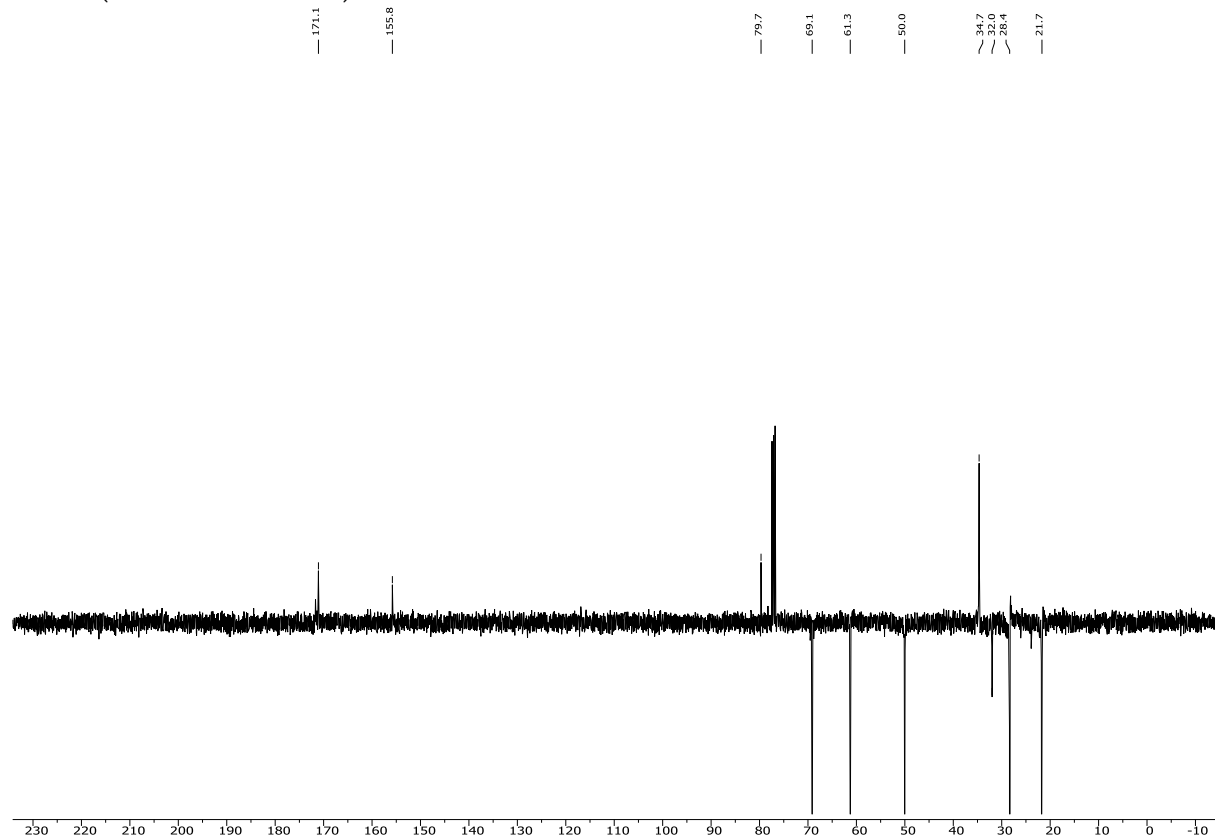

Compound **8a**  $^1\text{H}$  NMR (300 MHz,  $\text{CDCl}_3$ )

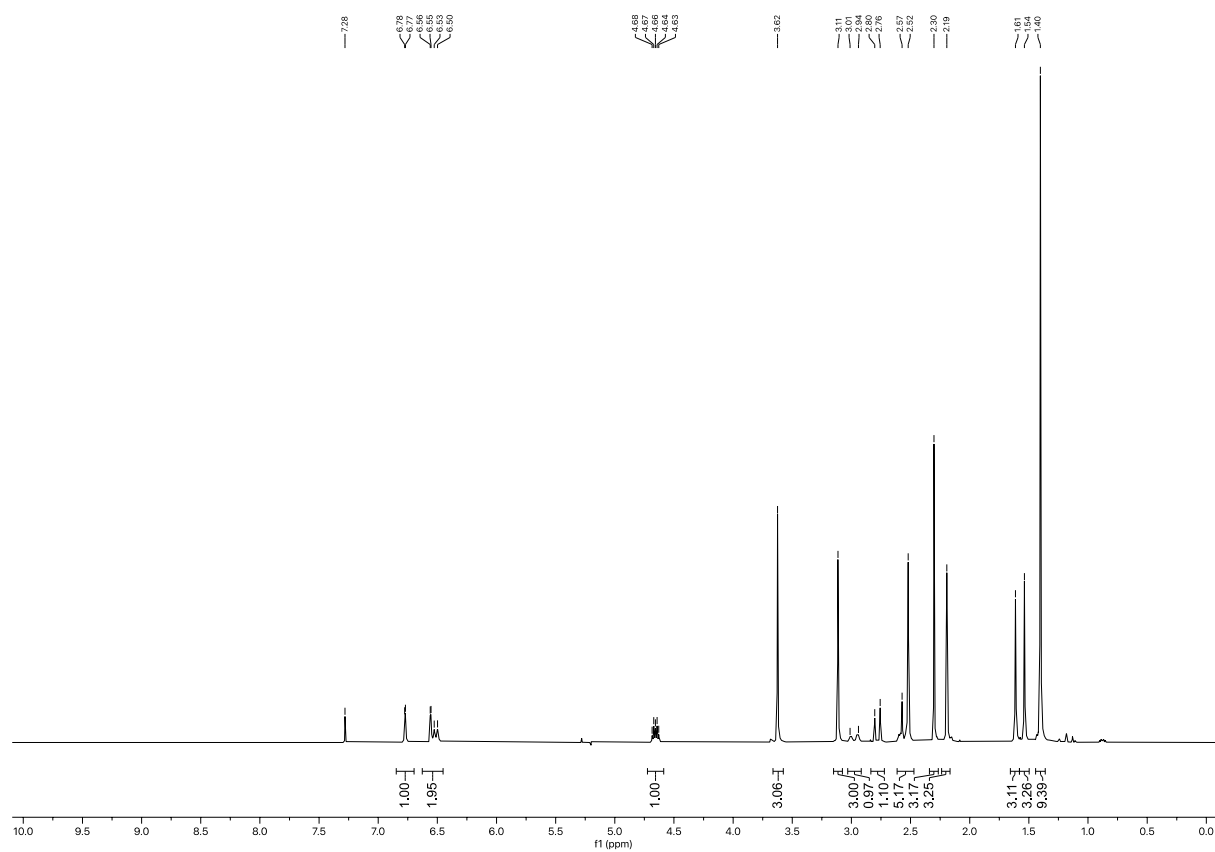

$^{13}\text{C}$  NMR (75 MHz,  $\text{CDCl}_3$ )

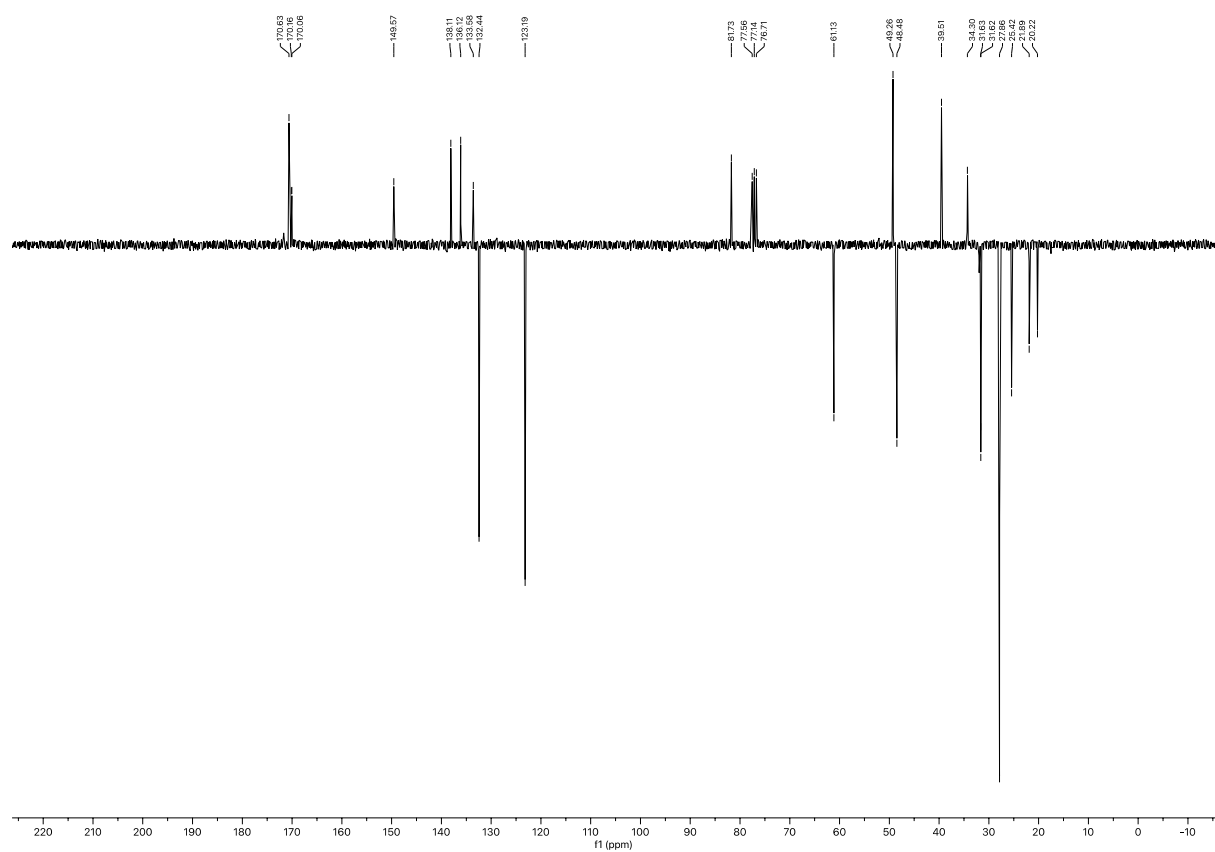

Compound **11b**  $^1\text{H}$  NMR (400 MHz,  $\text{CDCl}_3$ )

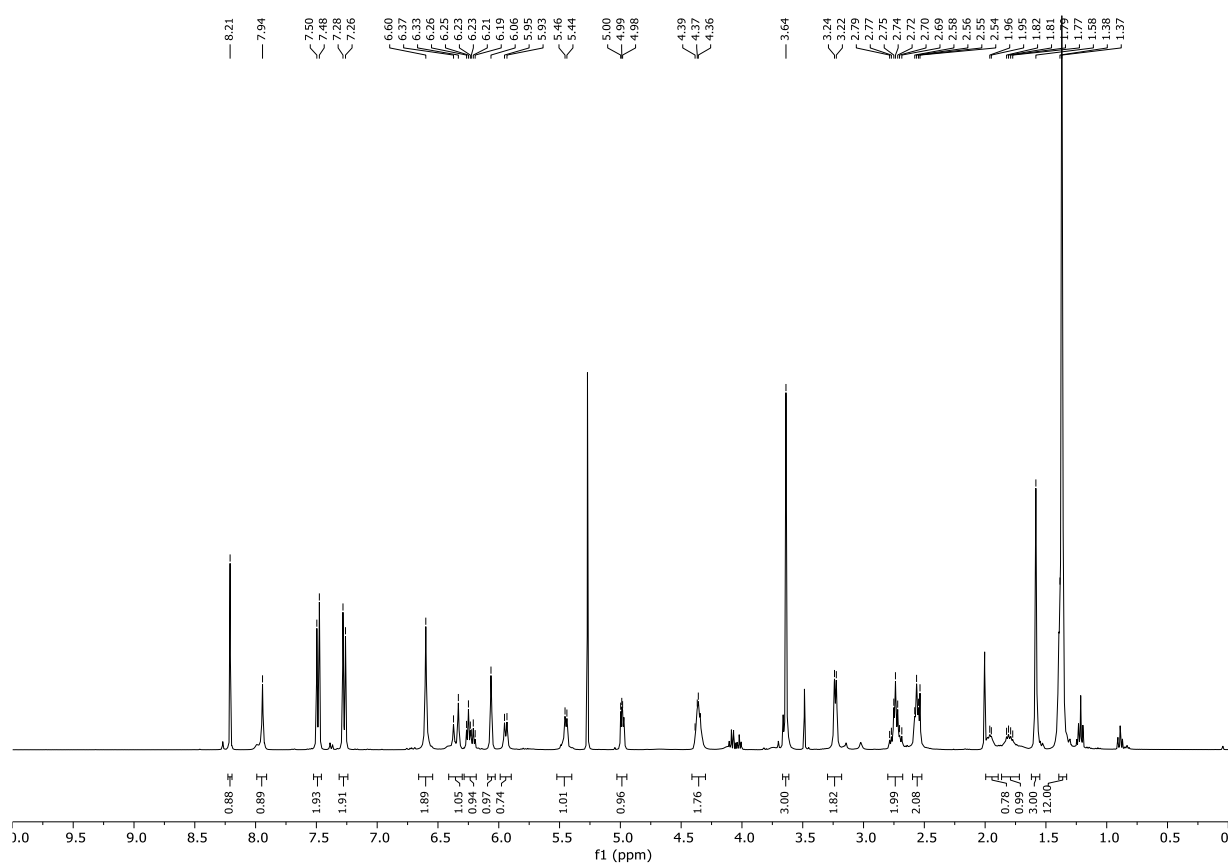

$^{13}\text{C}$  NMR  $\text{CDCl}_3$  (101 MHz,  $\text{CDCl}_3$ )

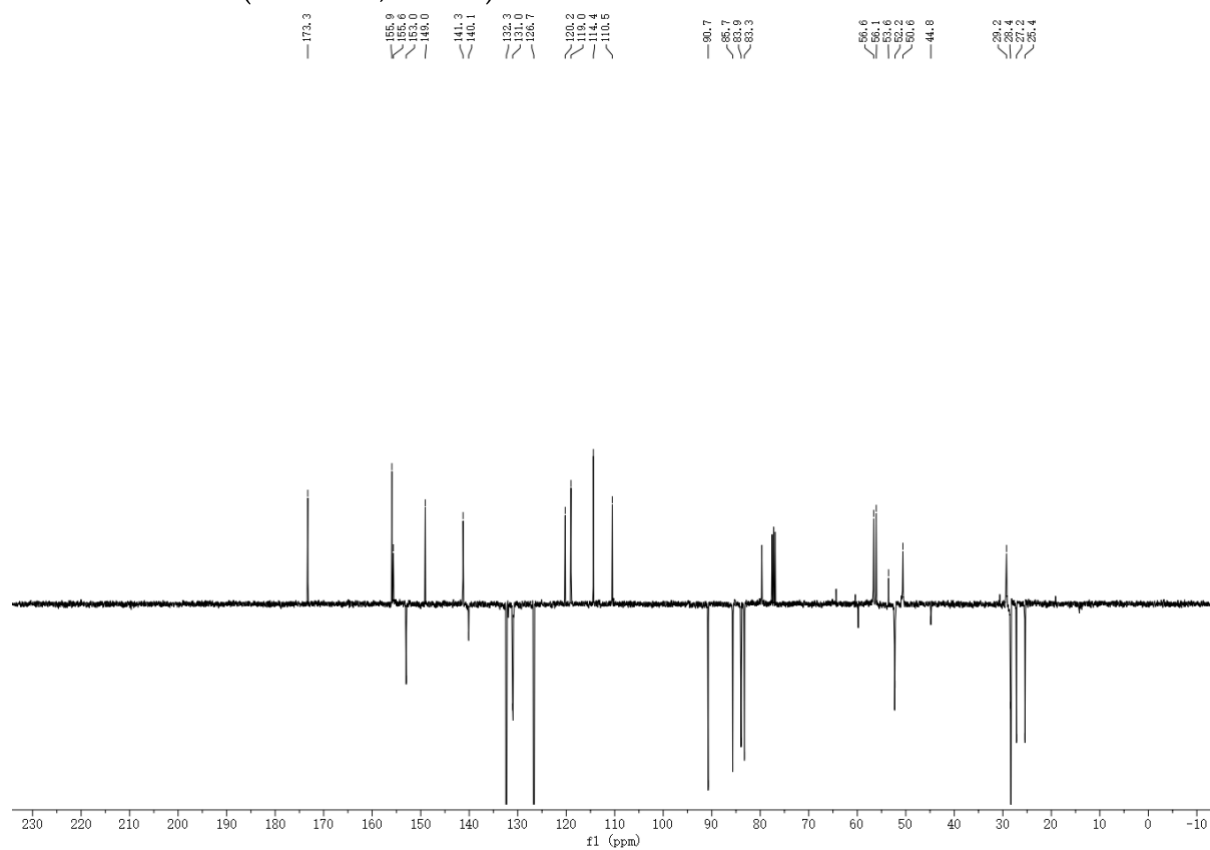

Compound **11c**  $^1\text{H}$  NMR (400 MHz,  $\text{CDCl}_3$ )

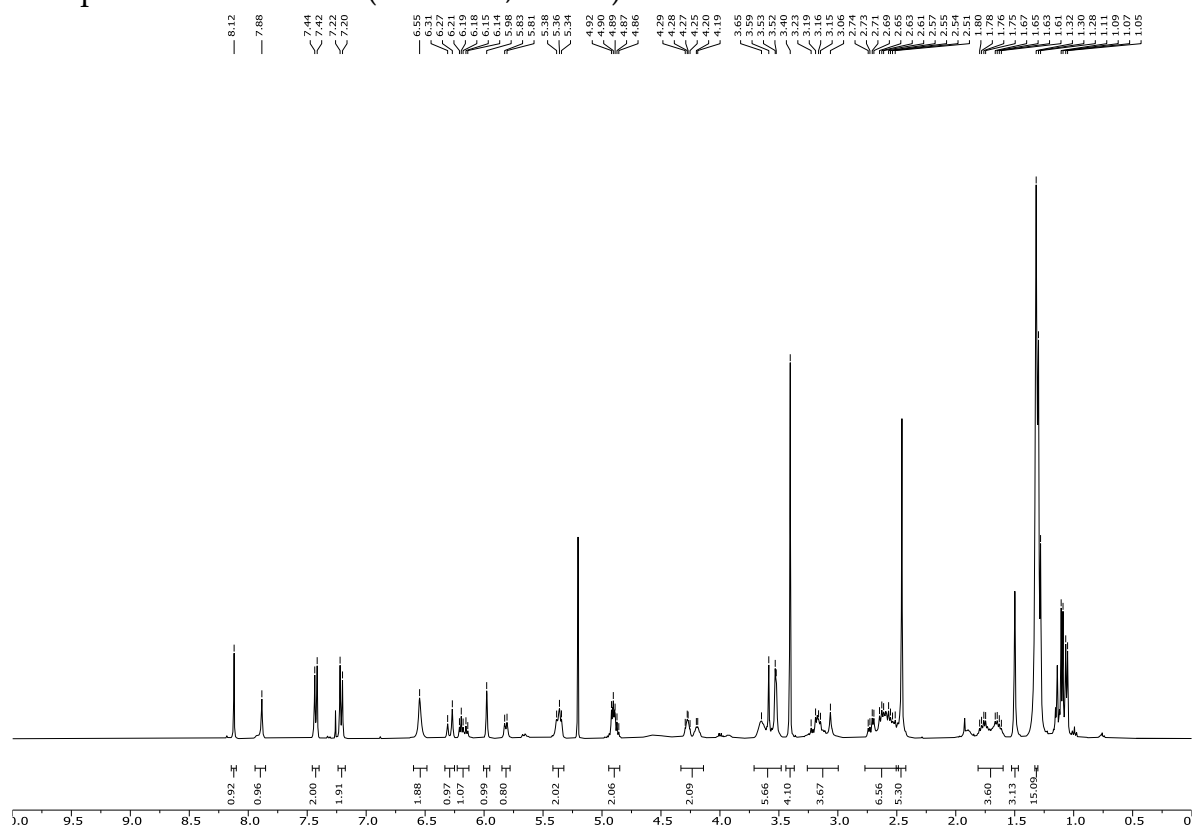

$^{13}\text{C}$  NMR (101 MHz,  $\text{CDCl}_3$ )

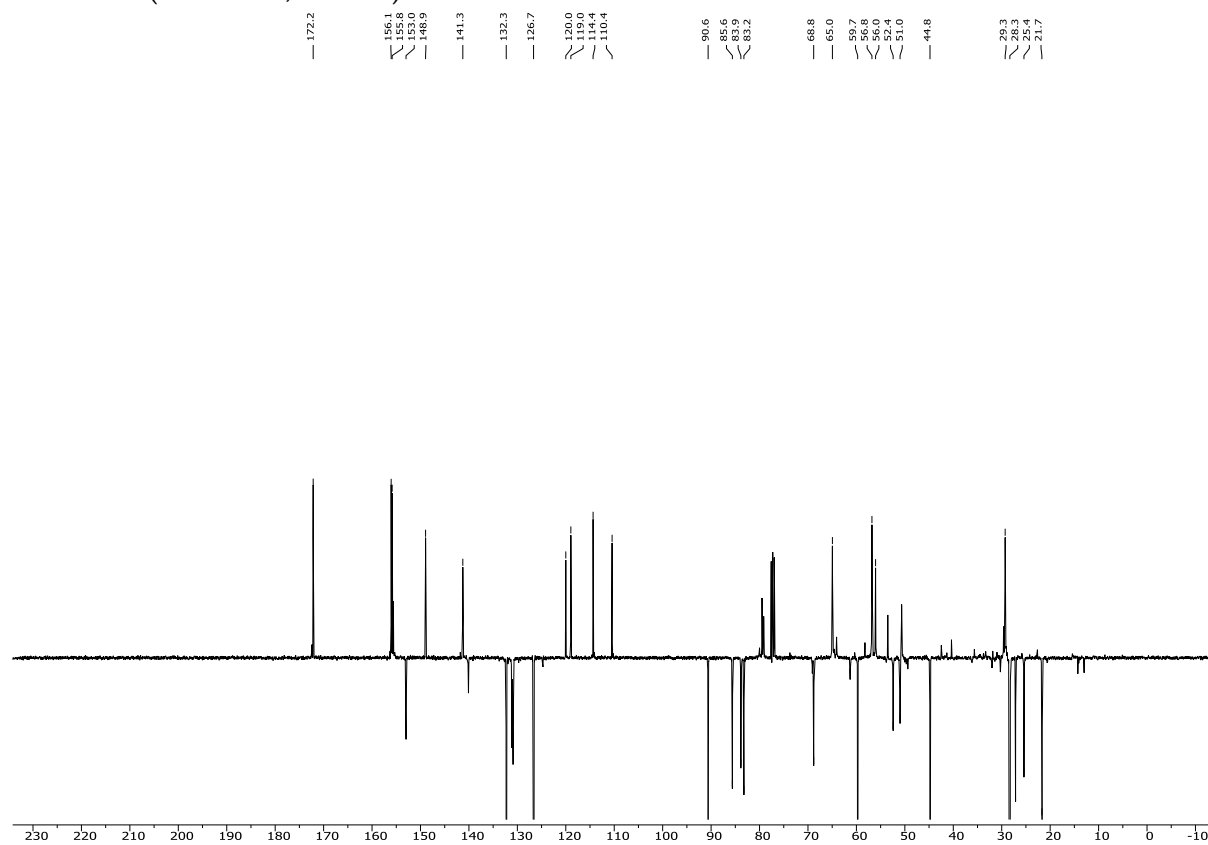



Compound **11d**  $^1\text{H}$  NMR (400 MHz,  $\text{CDCl}_3$ )

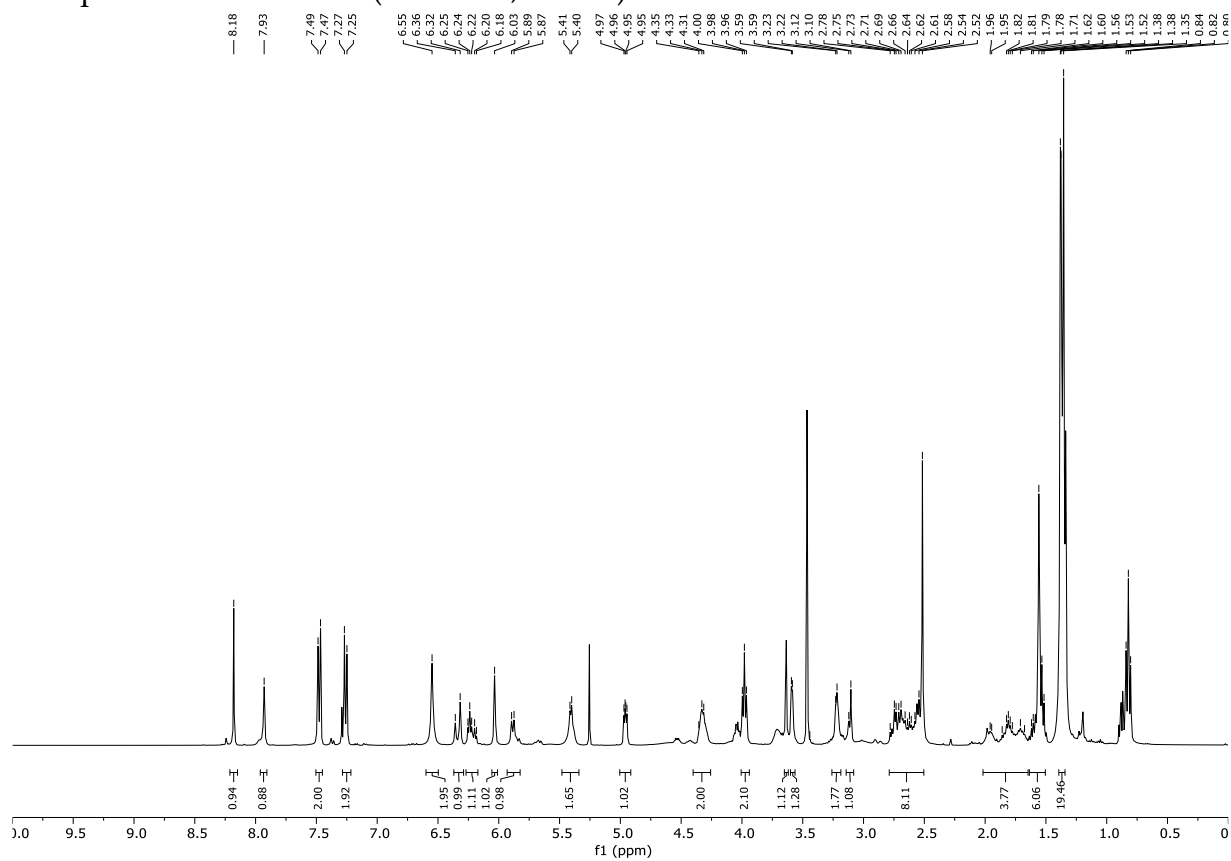

$^{13}\text{C}$  NMR (101 MHz,  $\text{CDCl}_3$ )

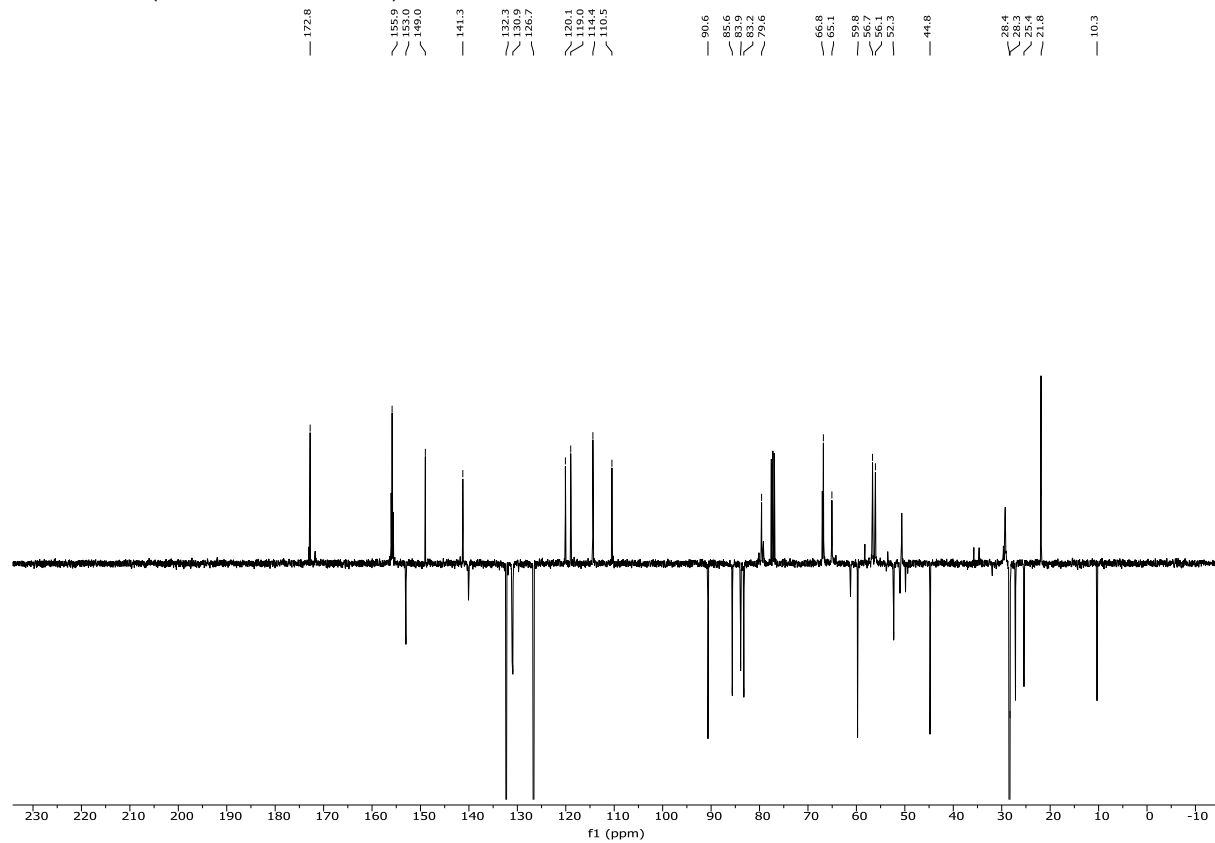

Compound **11e**  $^1\text{H}$  NMR  $\text{CDCl}_3$  (400 MHz,  $\text{CDCl}_3$ )

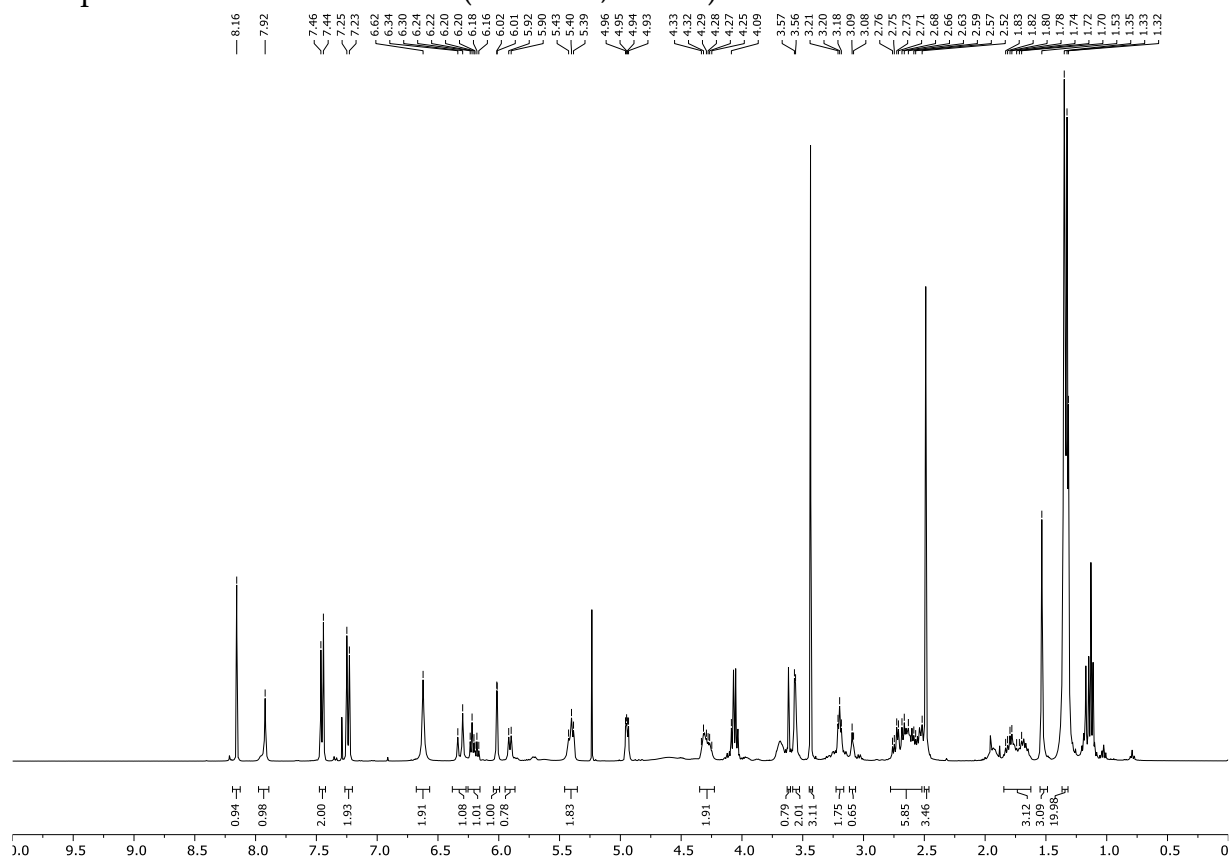

$^{13}\text{C}$  NMR  $\text{CDCl}_3$  (101 MHz,  $\text{CDCl}_3$ )

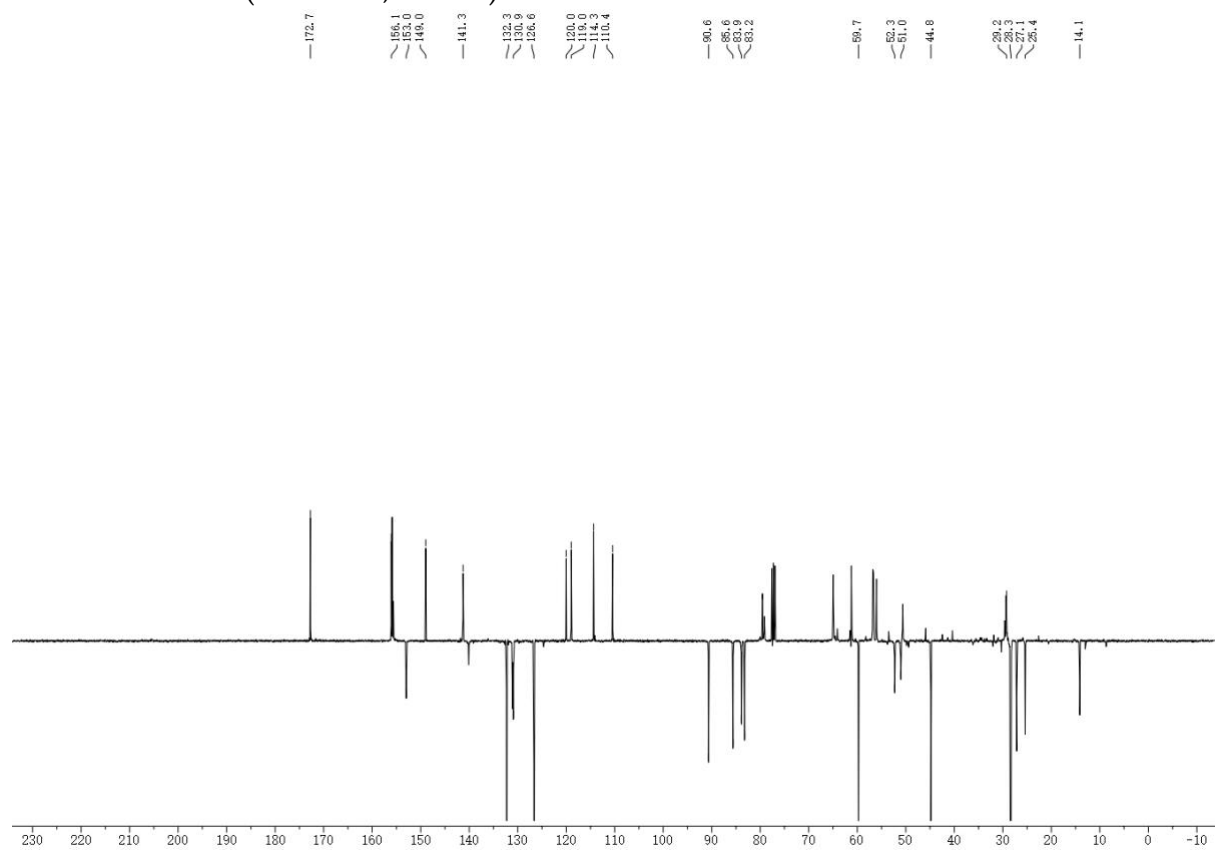

Compound **11f**  $^1\text{H}$  NMR (400 MHz,  $\text{CDCl}_3$ )

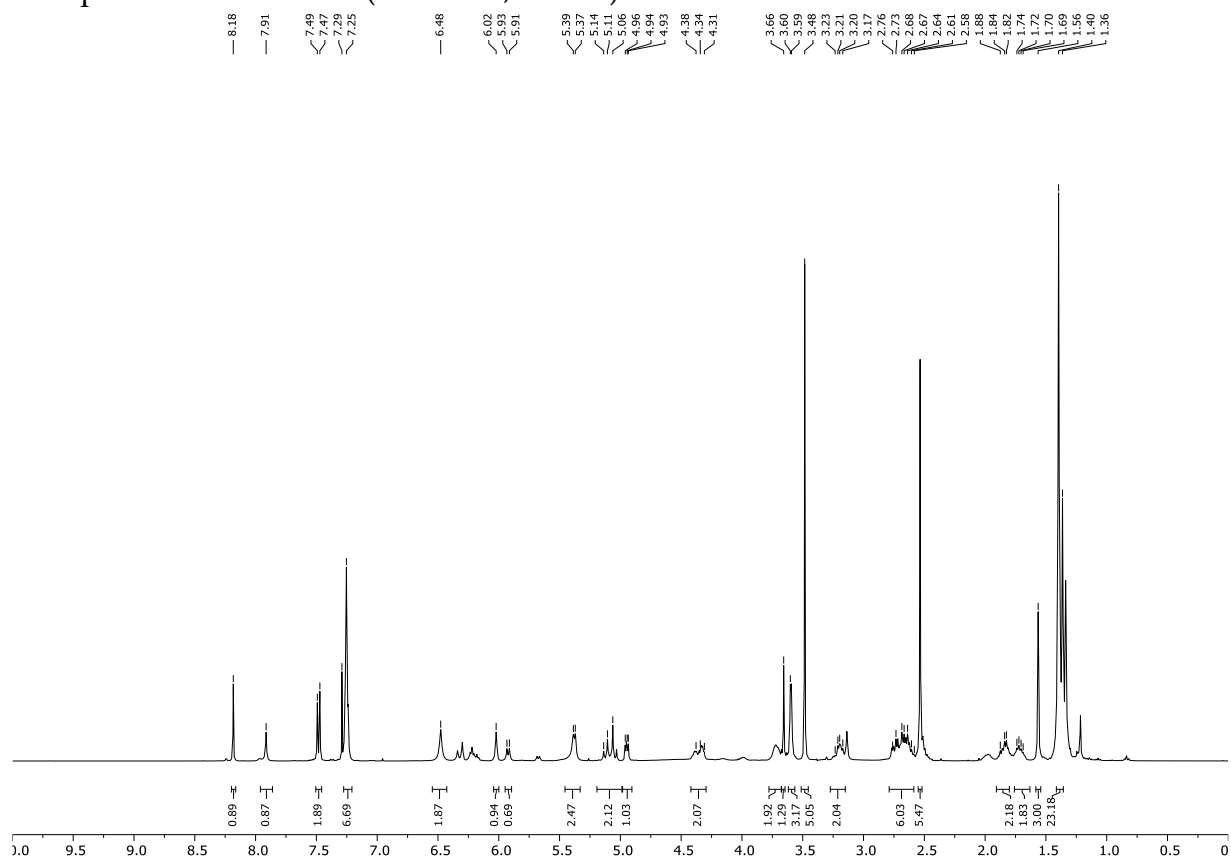

$^{13}\text{C}$  NMR (400 MHz,  $\text{CDCl}_3$ )

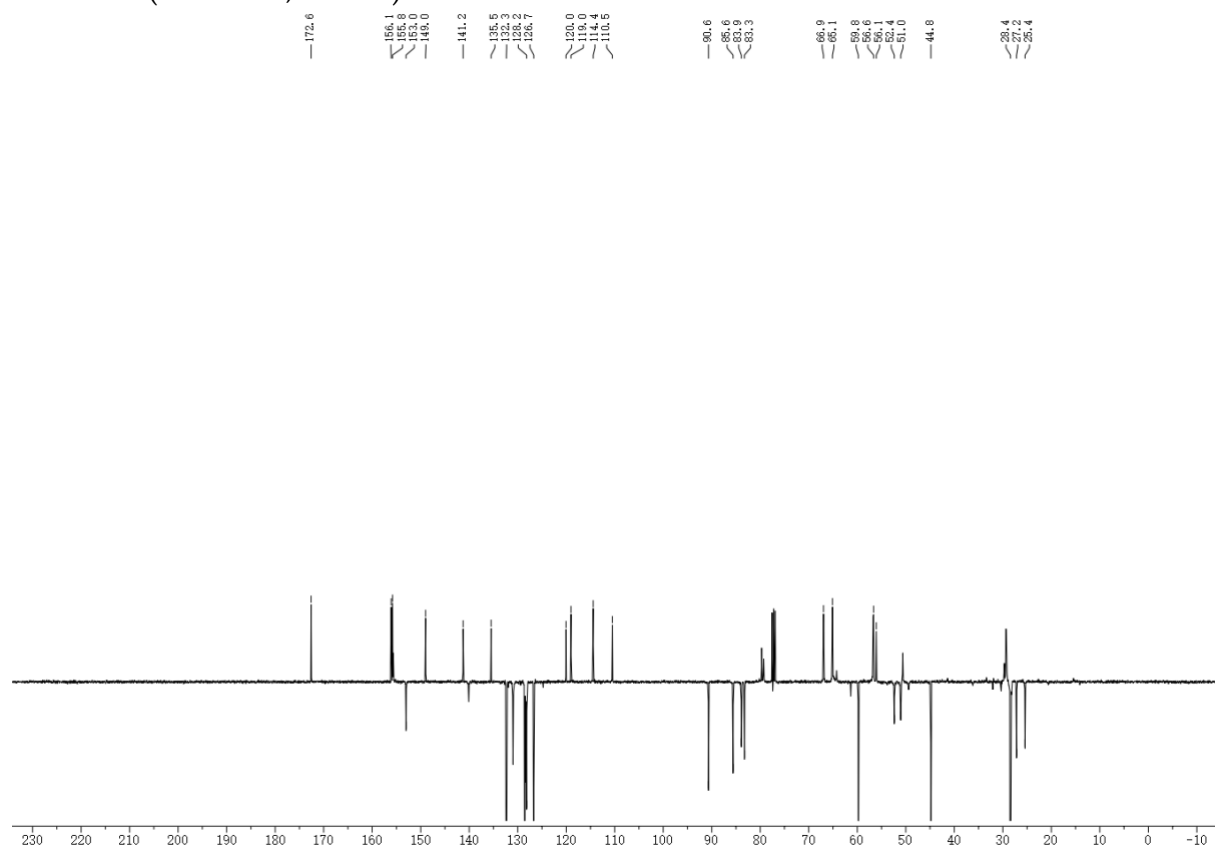

Compound **12b**  $^1\text{H}$  NMR (400 MHz,  $\text{CD}_3\text{OD}$ )

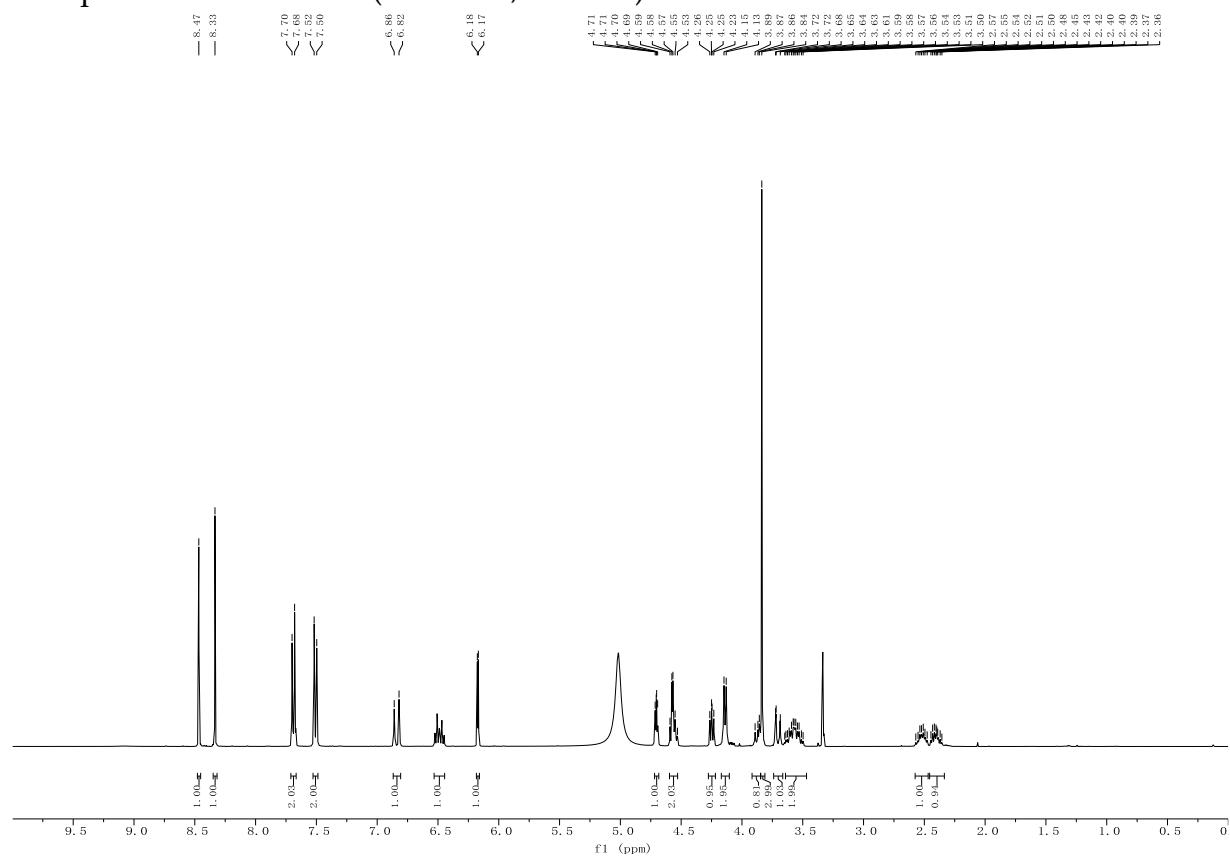

$^{13}\text{C}$  NMR (101 MHz,  $\text{CD}_3\text{OD}$ )

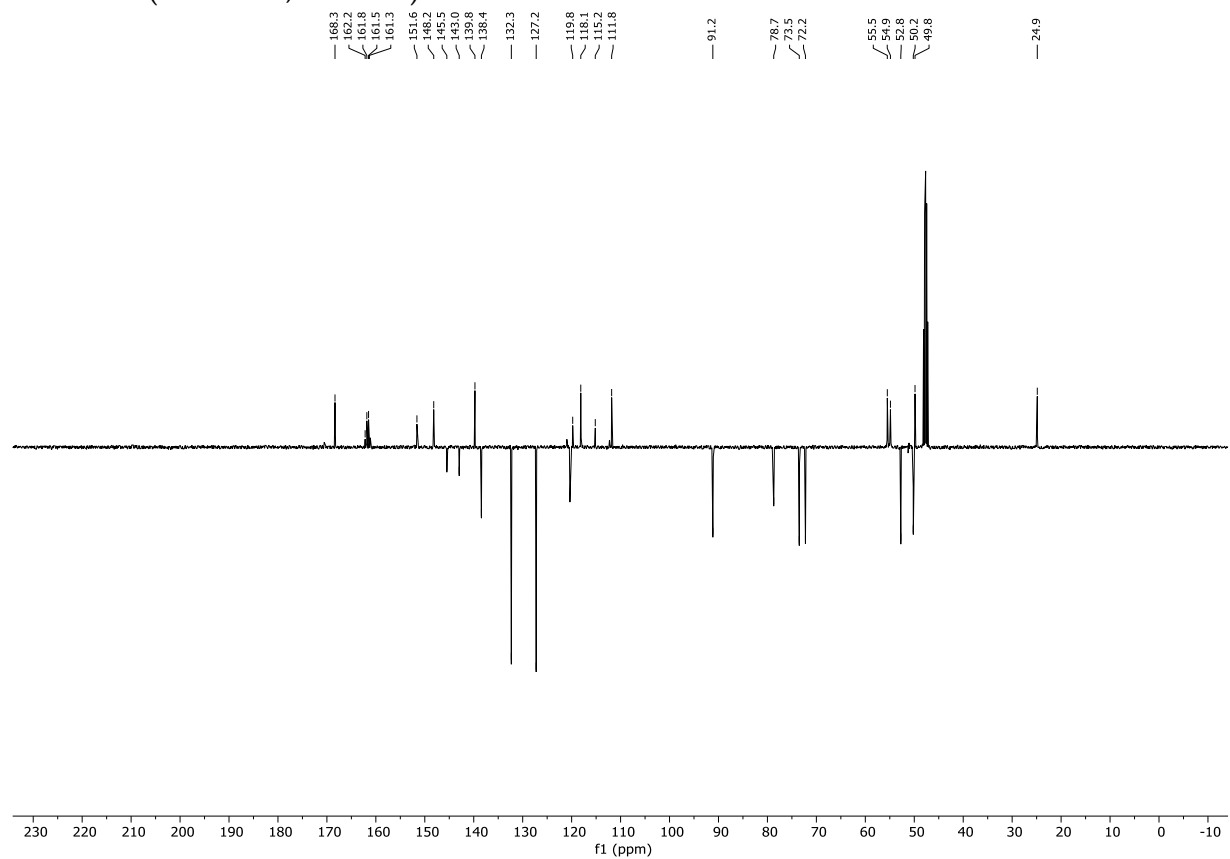

Compound **12c**  $^1\text{H}$  NMR (400 MHz,  $\text{CD}_3\text{OD}$ )

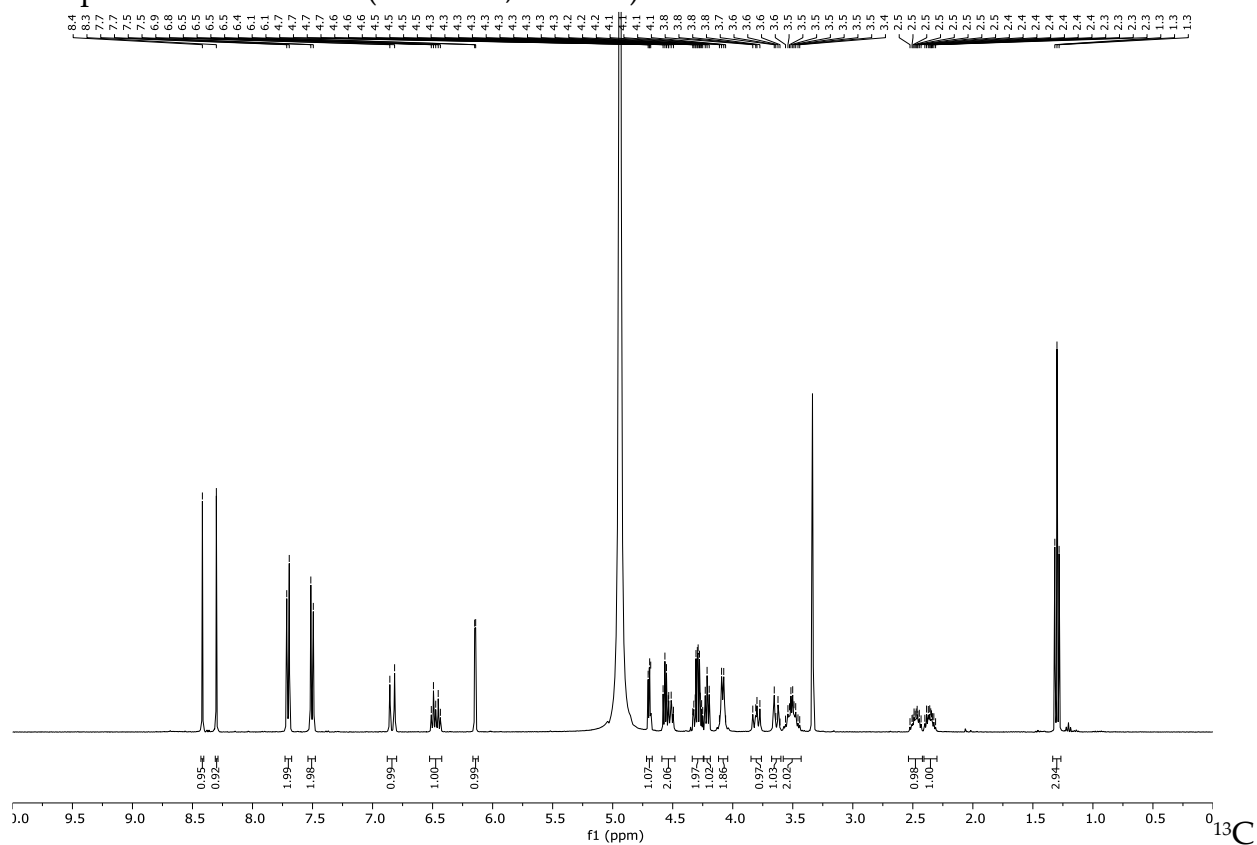

NMR (101 MHz,  $\text{CD}_3\text{OD}$ )

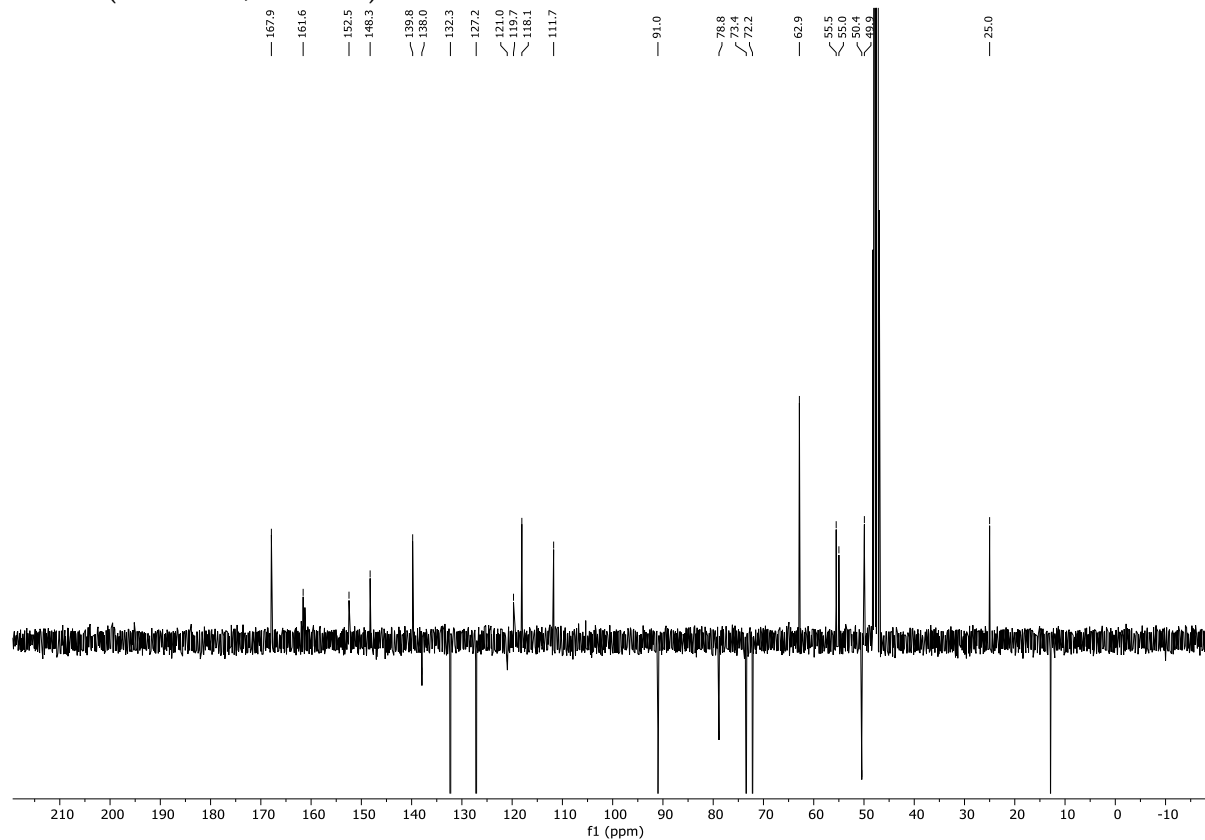

Compound **12d**  $^1\text{H}$  NMR (400 MHz,  $\text{CD}_3\text{OD}$ )

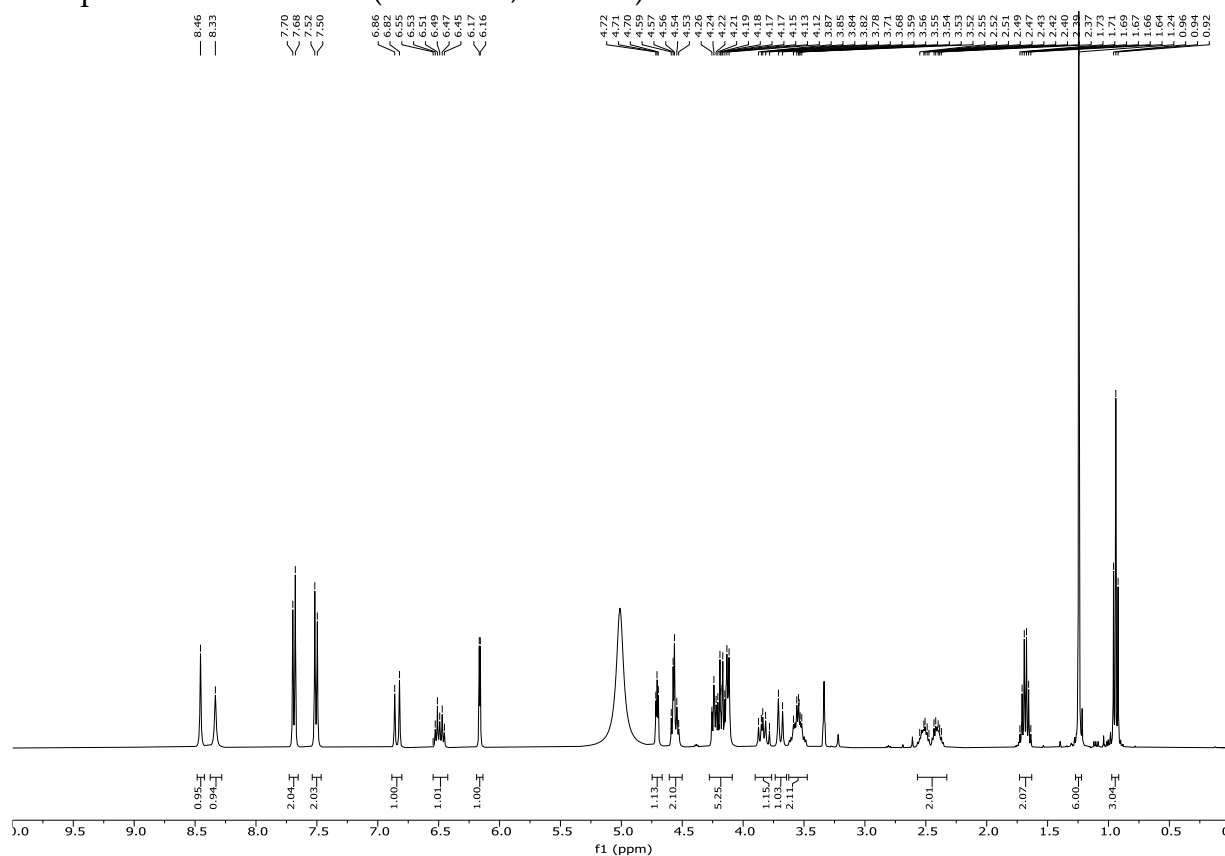

$^{13}\text{C}$  NMR (101 MHz,  $\text{CD}_3\text{OD}$ )

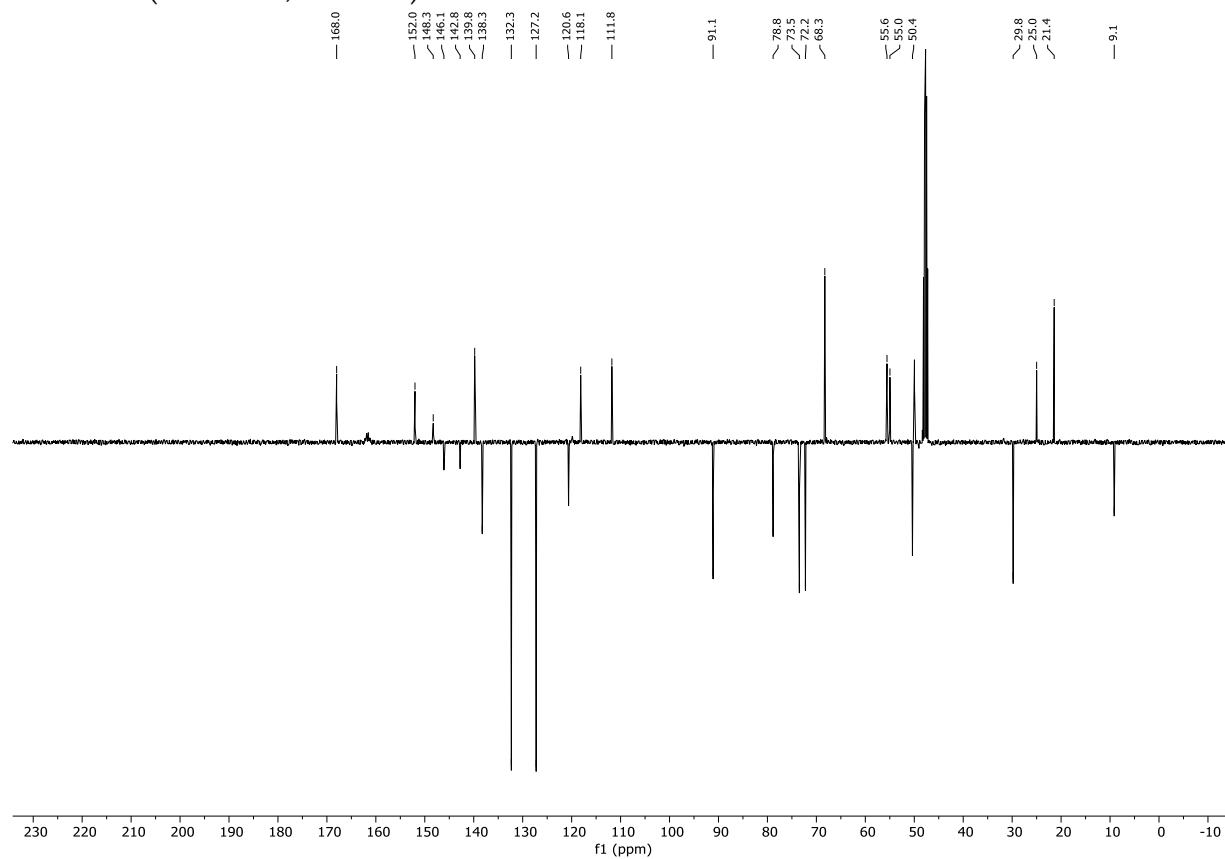

Compound **12e**  $^1\text{H}$  NMR (400 MHz,  $\text{CD}_3\text{OD}$ )

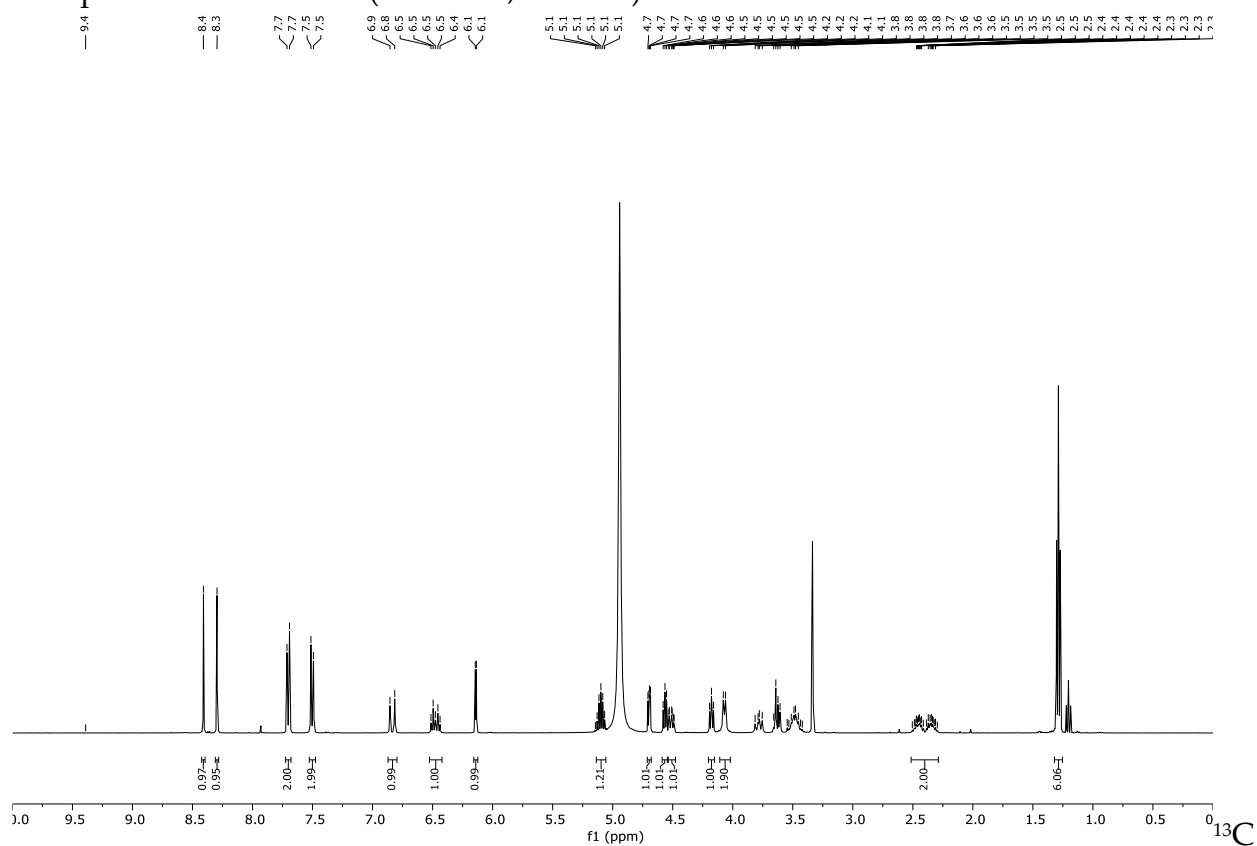

$^{13}\text{C}$  NMR (101 MHz,  $\text{CD}_3\text{OD}$ )

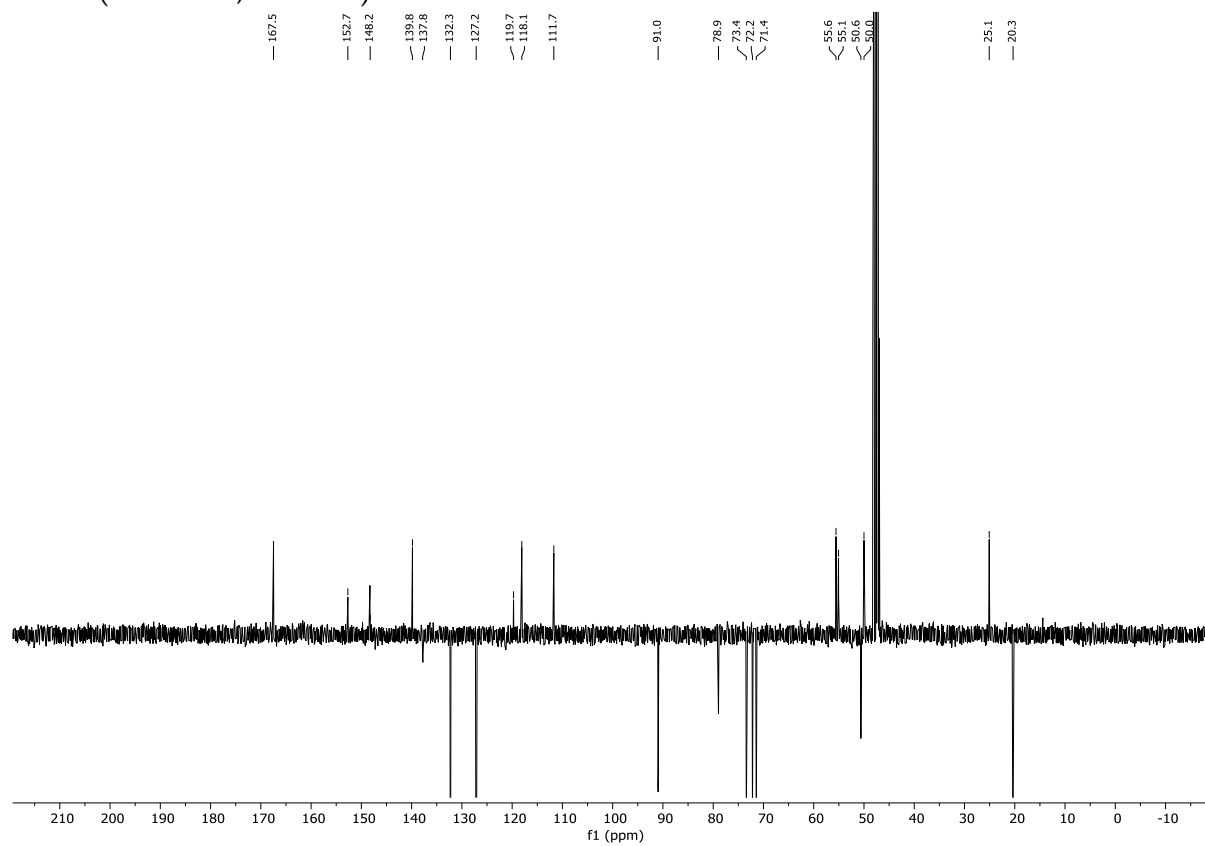

<sup>13</sup>C NMR spectrum of compound 10. The x-axis is labeled 'f1 (ppm)' and ranges from 0.0 to 10.0. The spectrum shows several peaks with corresponding integrations: 0.96, 0.96, 0.99, 4.95, 1.01, 1.02, 1.00, 2.11, 1.02, 2.06, 1.03, 1.90, 0.99, 0.99, 2.02, and 2.00. A list of chemical shifts (delta) is provided on the right side of the spectrum, ranging from 8.4 to 2.3 ppm.

13C NMR spectrum of compound 10. The x-axis is labeled 'f1 (ppm)' and ranges from -10 to 210. The spectrum shows several sharp peaks. Key peaks are labeled with their chemical shifts: 167.9, 152.1, 148.2, 134.7, 132.3, 119.7, 118.1, 111.8, 91.0, 78.8, 73.4, 72.2, 68.2, 55.5, 50.4, 49.9, and 25.0. A large solvent peak is visible at approximately 49.9 ppm.



Compound **13a**  $^1\text{H}$  NMR (400 MHz,  $\text{CDCl}_3$ )

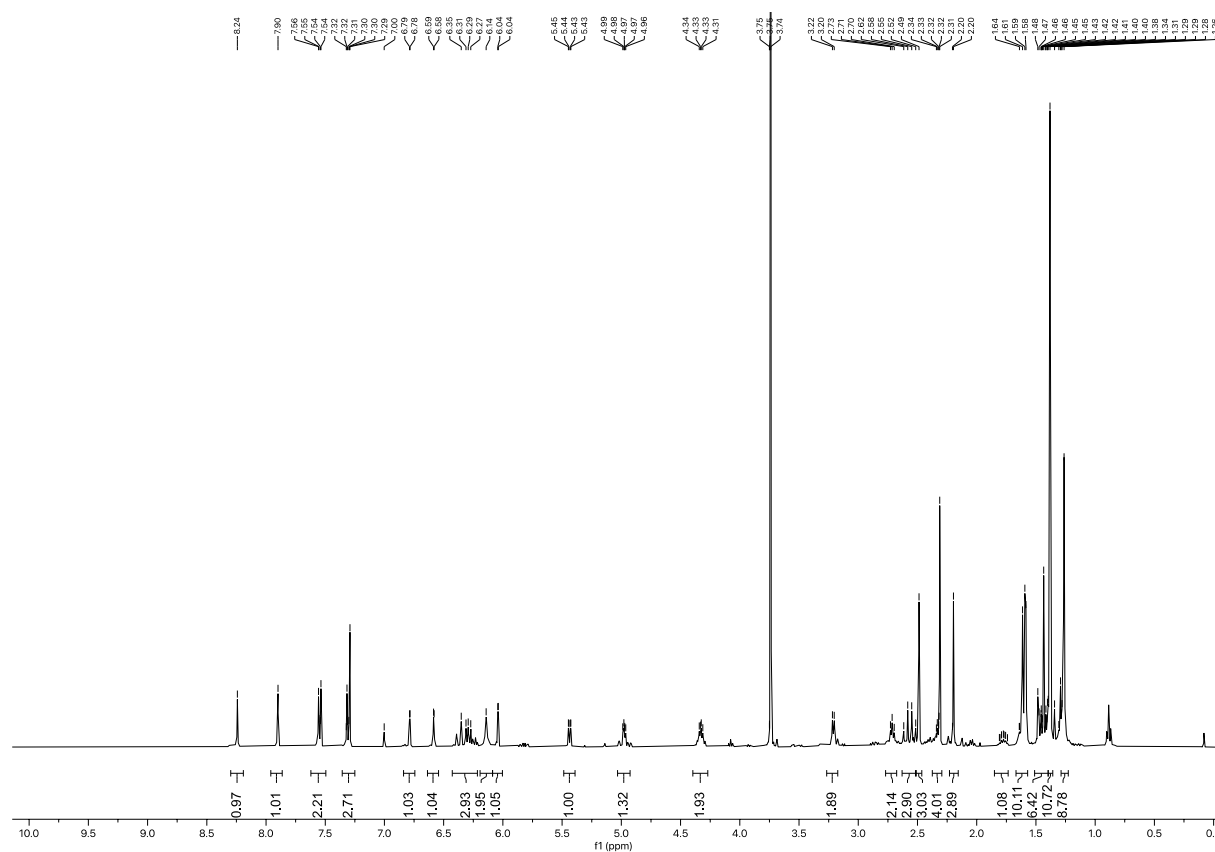

Compound **13b**  $^1\text{H}$  NMR (400 MHz,  $\text{CDCl}_3$ )

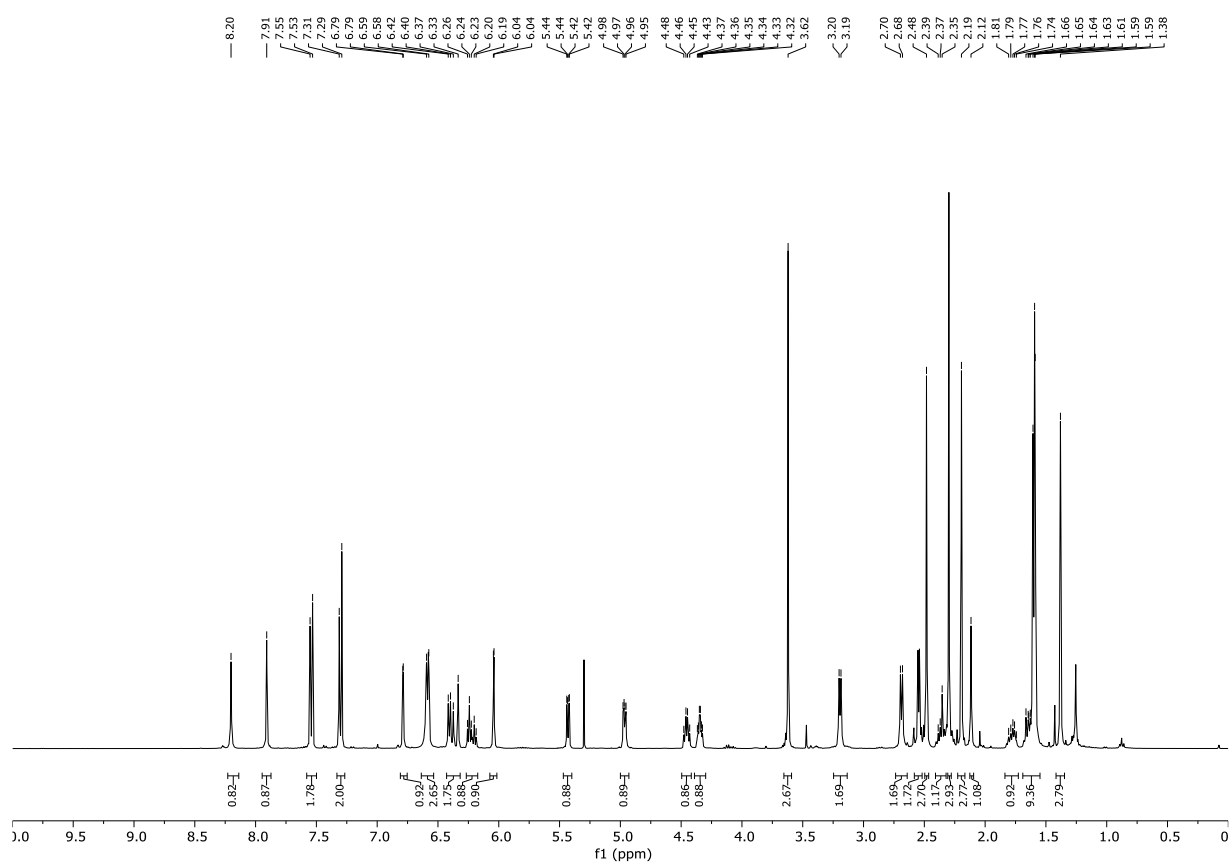

$^{13}\text{C}$  NMR (101 MHz,  $\text{CDCl}_3$ )

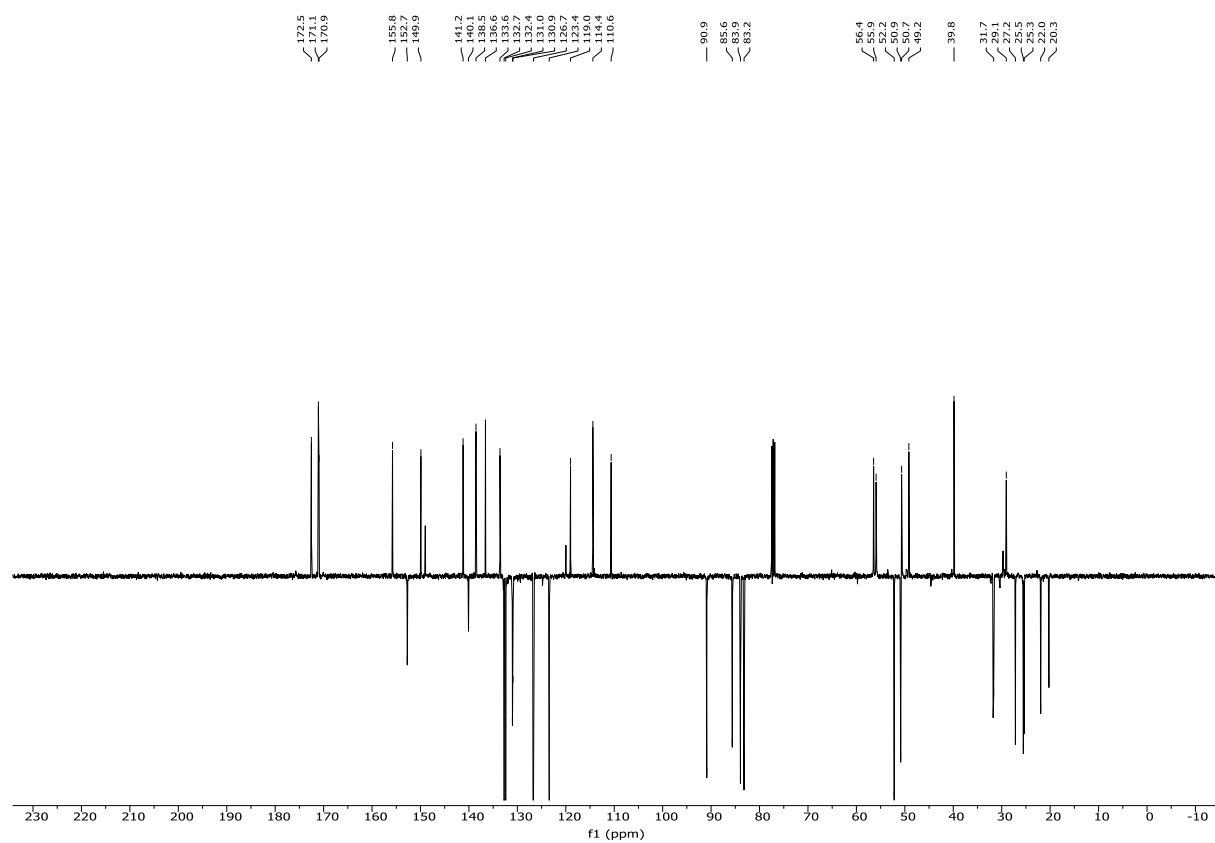

1H NMR spectrum of compound 10a in CDCl<sub>3</sub>. The spectrum shows peaks from 0.91 to 8.22 ppm. Integration values are provided below the baseline for each major peak group. The x-axis is labeled 'f1 (ppm)' and ranges from 10.0 to 0.0.

| Chemical Shift (ppm) | Integration |
|----------------------|-------------|
| 8.22                 | 0.91        |
| 7.91                 | 1.04        |
| 7.58                 | 2.02        |
| 7.55                 | 2.60        |
| 7.21                 | 1.19        |
| 7.20                 | 1.09        |
| 6.79                 | 3.88        |
| 6.77                 | 0.83        |
| 6.75                 | 1.00        |
| 6.25                 | 1.00        |
| 6.21                 | 0.98        |
| 6.00                 | 1.00        |
| 5.85                 | 0.97        |
| 5.84                 | 1.06        |
| 5.83                 | 2.51        |
| 5.43                 | 1.80        |
| 4.97                 | 1.77        |
| 4.96                 | 2.69        |
| 4.86                 | 3.30        |
| 4.45                 | 5.28        |
| 4.43                 | 3.75        |
| 4.35                 | 1.05        |
| 4.33                 | 0.94        |
| 4.13                 | 11.12       |
| 4.12                 | 1.10        |
| 4.08                 | 3.91        |
| 4.06                 | 3.61        |
| 3.21                 | 1.77        |
| 3.19                 | 2.69        |
| 2.71                 | 3.30        |
| 2.69                 | 5.28        |
| 2.62                 | 3.75        |
| 2.59                 | 1.05        |
| 2.56                 | 0.94        |
| 2.39                 | 11.12       |
| 2.34                 | 1.10        |
| 2.33                 | 3.91        |
| 2.31                 | 3.61        |
| 2.17                 | 1.77        |
| 2.10                 | 2.69        |
| 2.00                 | 3.30        |
| 1.66                 | 5.28        |
| 1.65                 | 3.75        |
| 1.61                 | 1.05        |
| 1.59                 | 0.94        |
| 1.57                 | 11.12       |
| 1.43                 | 1.10        |
| 1.37                 | 3.91        |
| 1.36                 | 3.61        |
| 1.34                 | 1.77        |
| 1.30                 | 2.69        |
| 1.28                 | 3.30        |
| 1.22                 | 5.28        |
| 1.19                 | 3.75        |

<sup>13</sup>C NMR spectrum (ppm) of compound 10b. The x-axis ranges from -10 to 230 ppm. The spectrum shows several sharp peaks, with the following chemical shift values labeled:

- 173.07, 171.07, 170.86
- 155.73, 155.69, 149.89, 149.06
- 141.22, 138.57, 136.65, 132.47, 132.41, 130.88, 128.68, 124.82, 120.11, 119.04, 114.53, 110.61
- 95.89, 86.05, 83.55, 83.23, 77.48, 77.16, 76.84
- 61.71, 61.23, 56.55, 56.08, 50.73, 49.20
- 39.81, 31.76, 30.56, 29.73, 29.40, 29.37, 25.53, 23.27, 21.96, 20.27
- 14.17

Compound 13e <sup>1</sup>H (400 MHz, CDCl<sub>3</sub>)

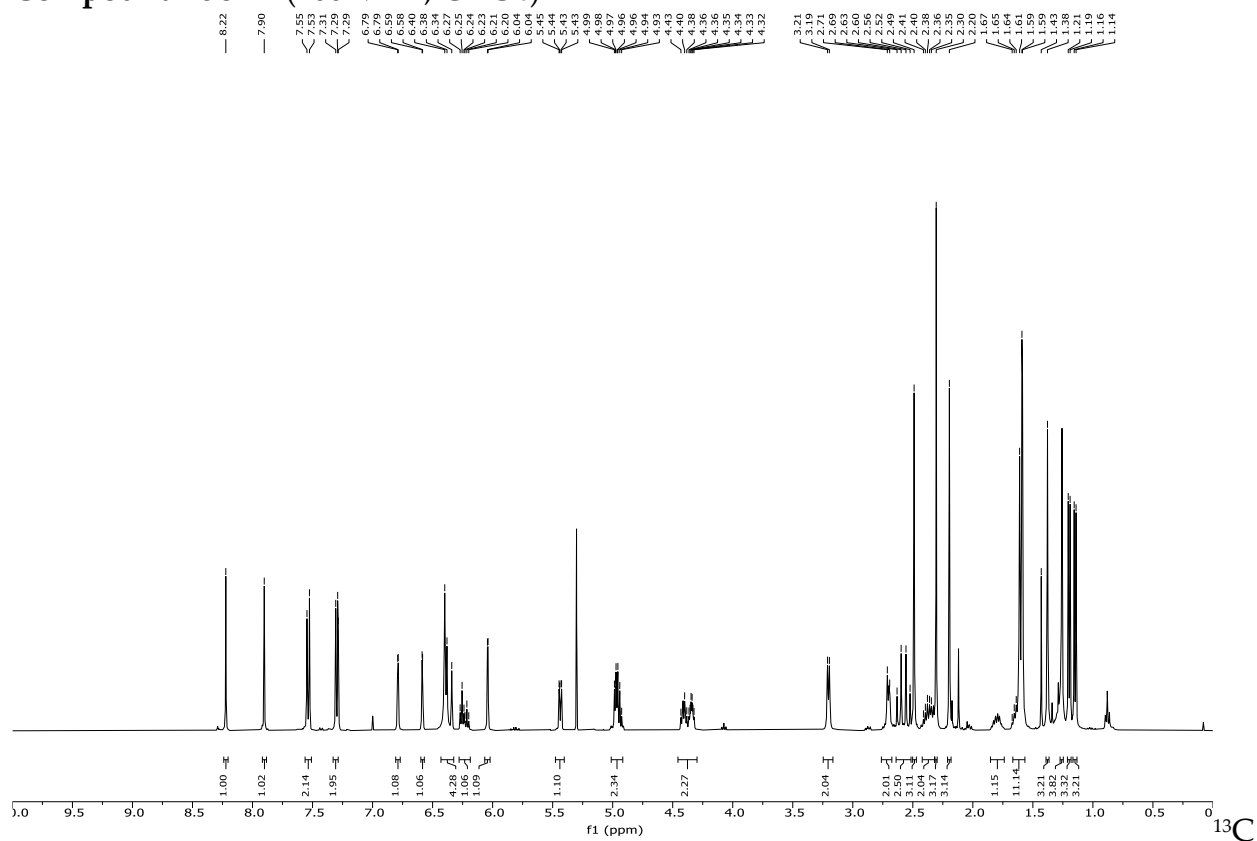

NMR (101 MHz, CDCl<sub>3</sub>)

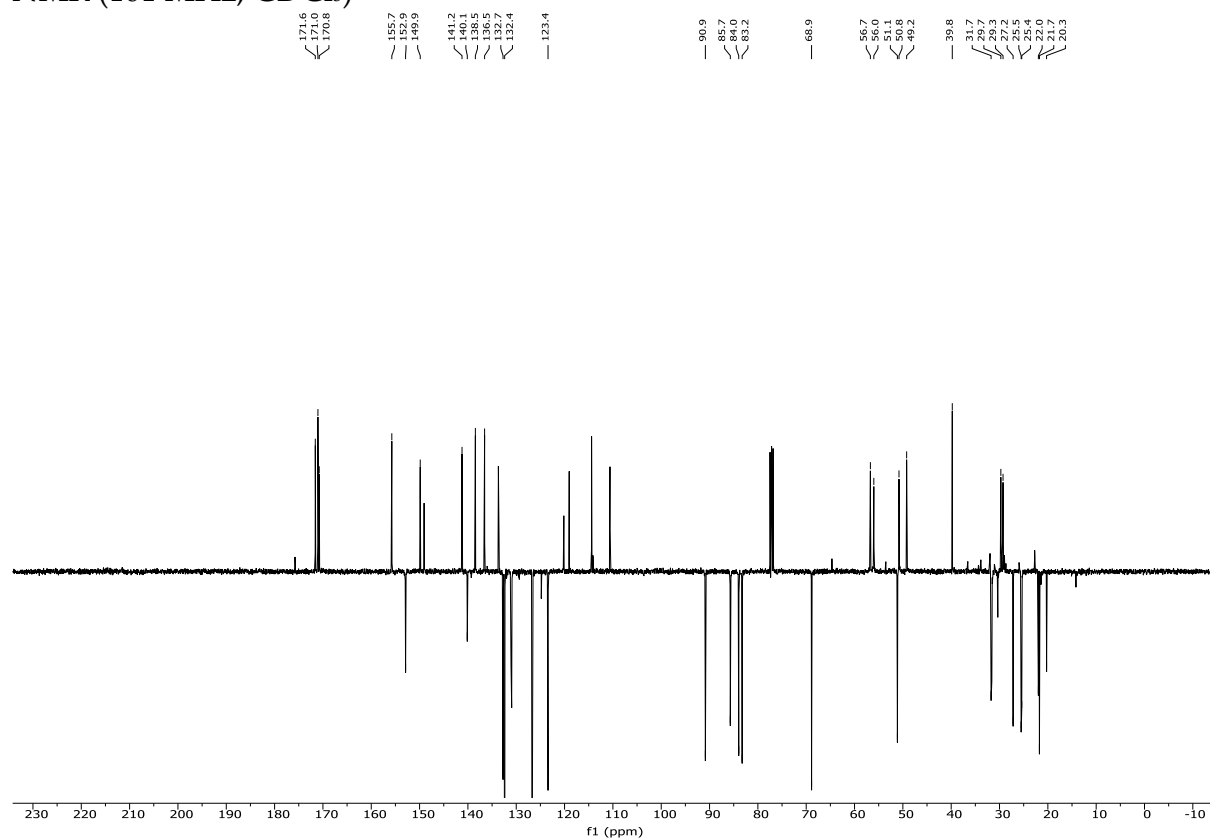

<sup>1</sup>H NMR spectrum of compound 10a in CDCl<sub>3</sub>. The x-axis represents the chemical shift in ppm, ranging from 0.00 to 10.00. The spectrum shows several peaks, with integration values provided below the baseline. A list of chemical shifts (δ) is provided on the right side of the spectrum.

Chemical shifts (δ) listed on the right:

- 8.47, 8.33, 8.12, 8.10, 7.81, 7.56, 6.84, 6.75, 6.74, 6.86, 6.44, 6.02, 6.01, 5.75, 4.60, 4.66, 4.39, 4.36, 3.99, 3.97, 3.90, 3.19, 3.02, 2.95, 2.96, 2.84, 2.82, 2.81, 2.80, 2.79, 2.68, 2.67, 2.47, 2.46, 2.26, 2.25, 2.24, 2.23, 2.22, 2.21, 2.18, 2.16, 2.07, 1.94, 1.91, 1.48, 1.44, 1.43, 1.41.

Integration values listed below the baseline:

- 0.91, 0.99, 0.83, 1.26, 2.02, 1.81, 2.01, 1.07, 0.95, 1.00, 1.11, 1.16, 2.17, 2.88, 1.16, 1.12, 15.61, 6.77, 0.89, 5.87.

Compound **14b**  $^1\text{H}$  NMR (400 MHz,  $\text{CD}_3\text{OD}$ )

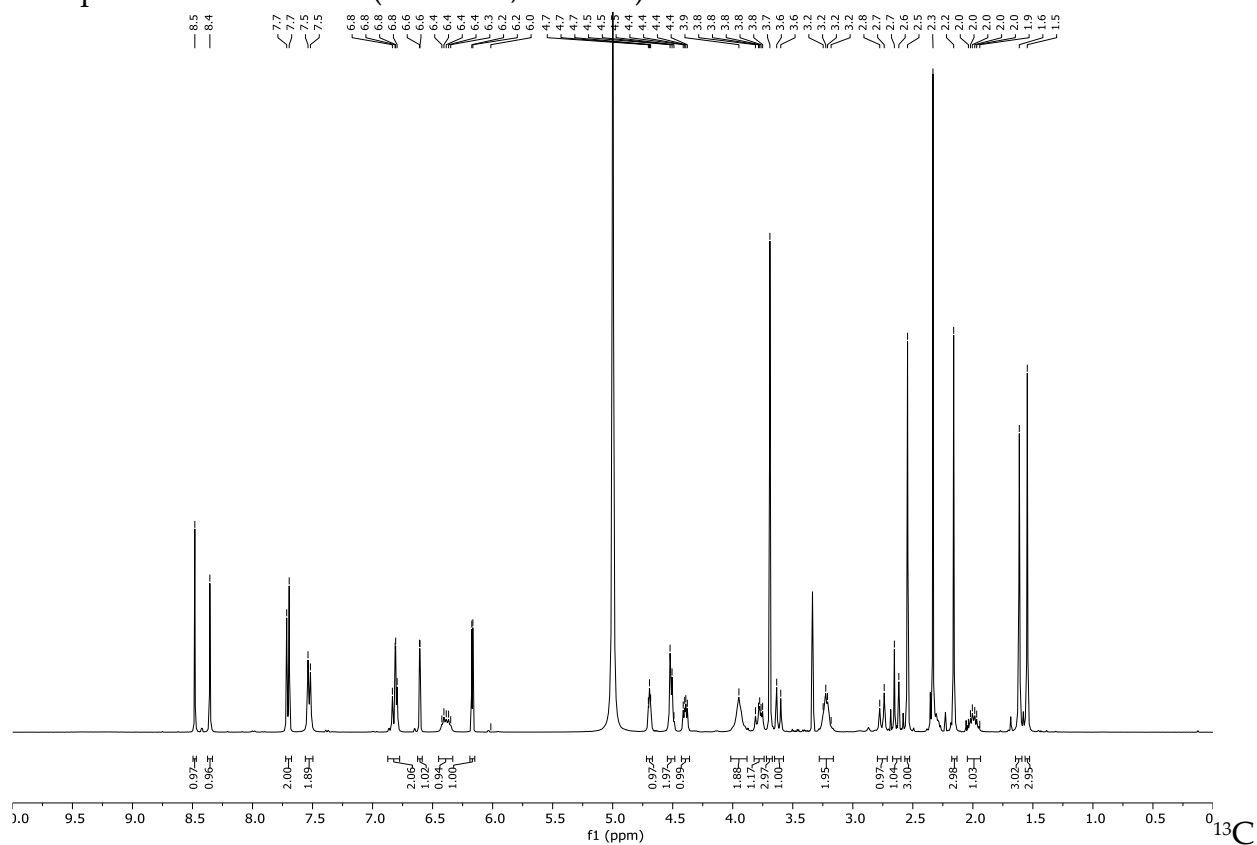

$^{13}\text{C}$  NMR (400 MHz,  $\text{CD}_3\text{OD}$ )

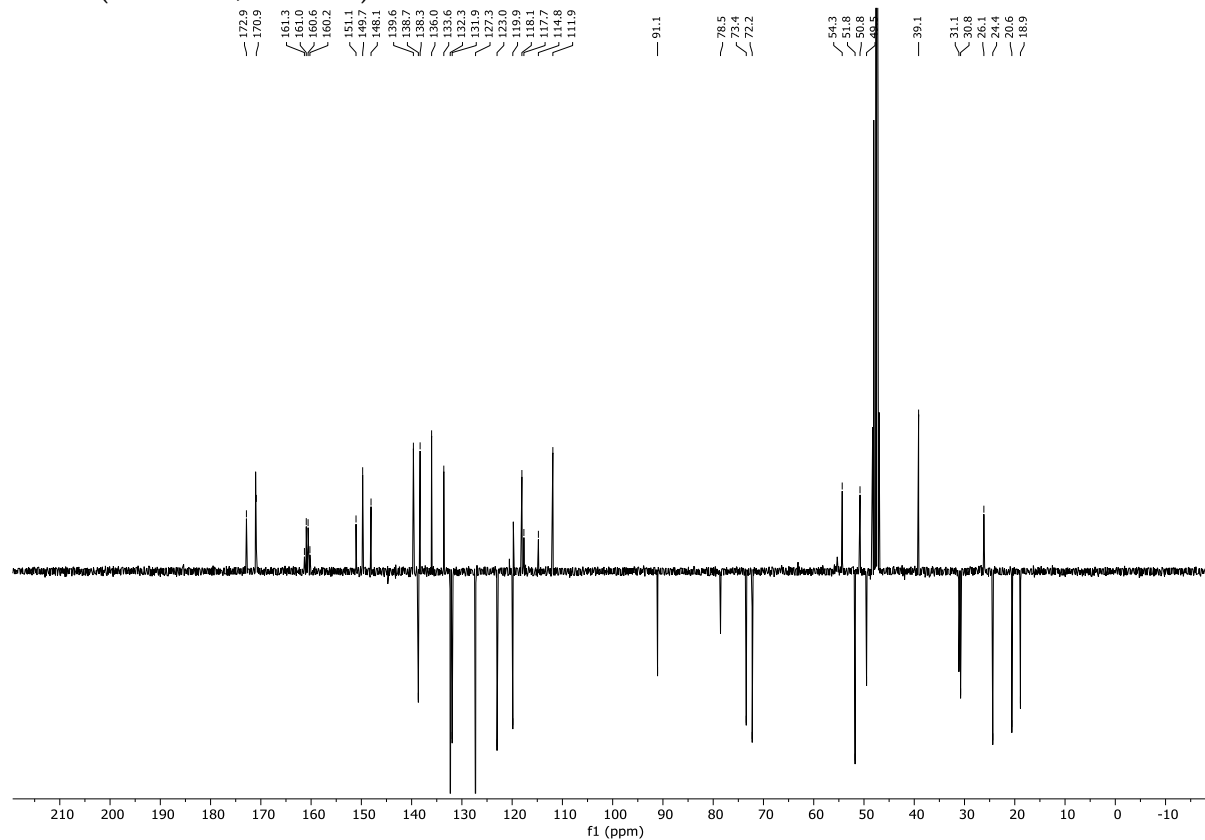

Compound **14c**  $^1\text{H}$  NMR (400 MHz,  $\text{CD}_3\text{OD}$ )

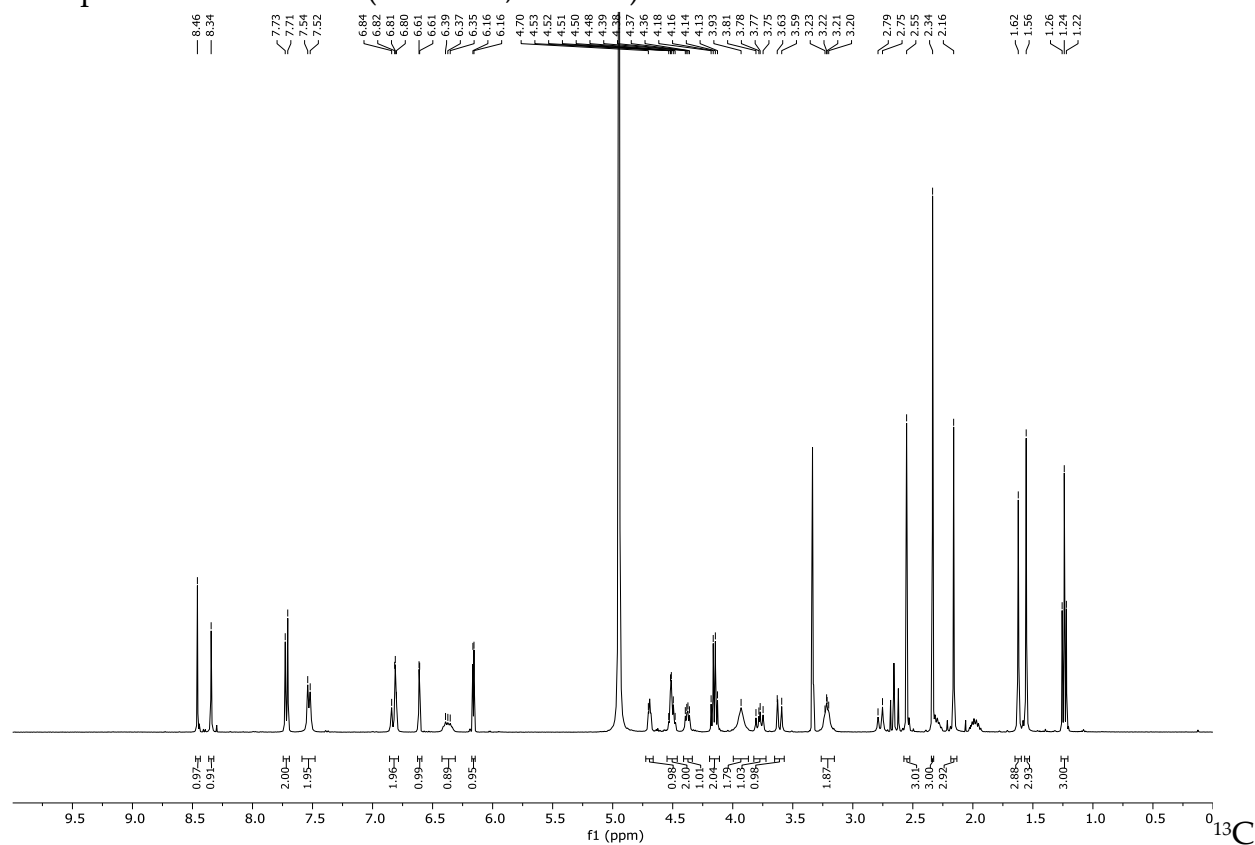

NMR (400 MHz,  $\text{CD}_3\text{OD}$ )

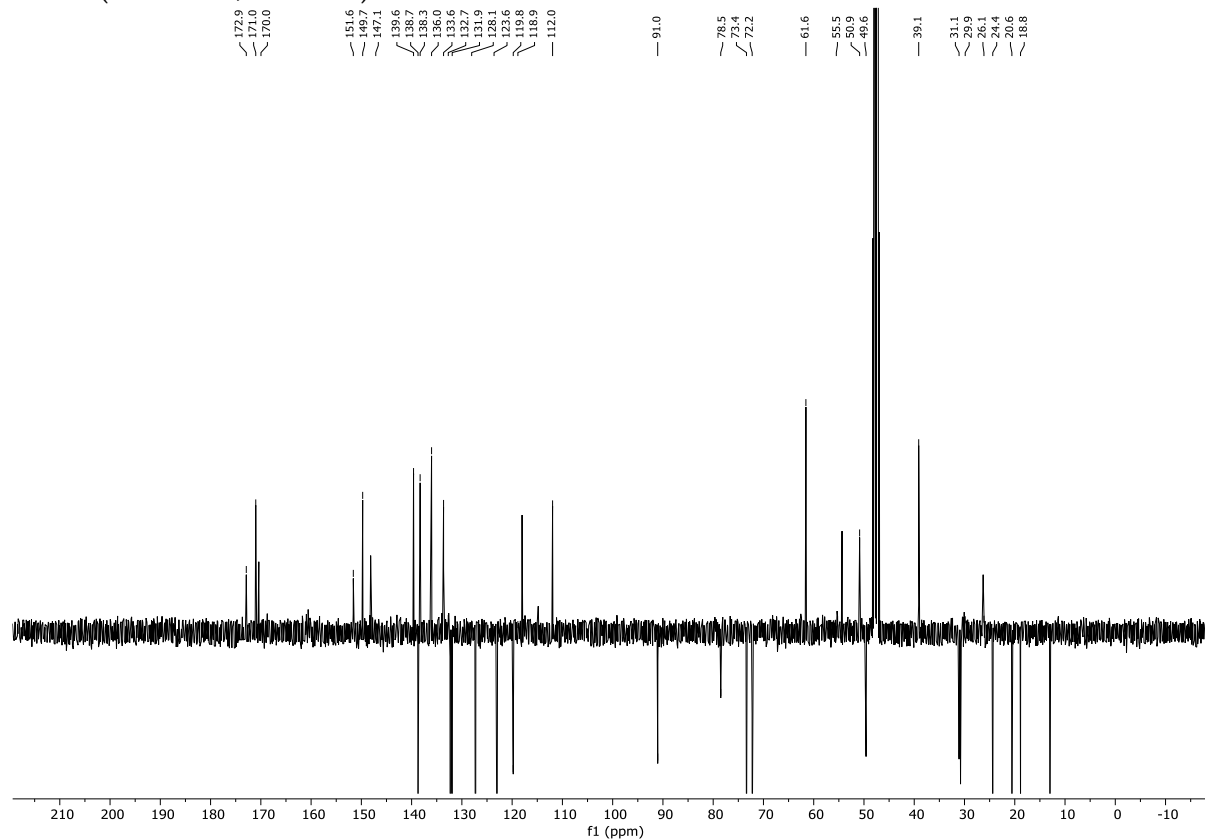

Compound **14d**  $^1\text{H}$  NMR (500 MHz,  $\text{CD}_3\text{OD}$ )

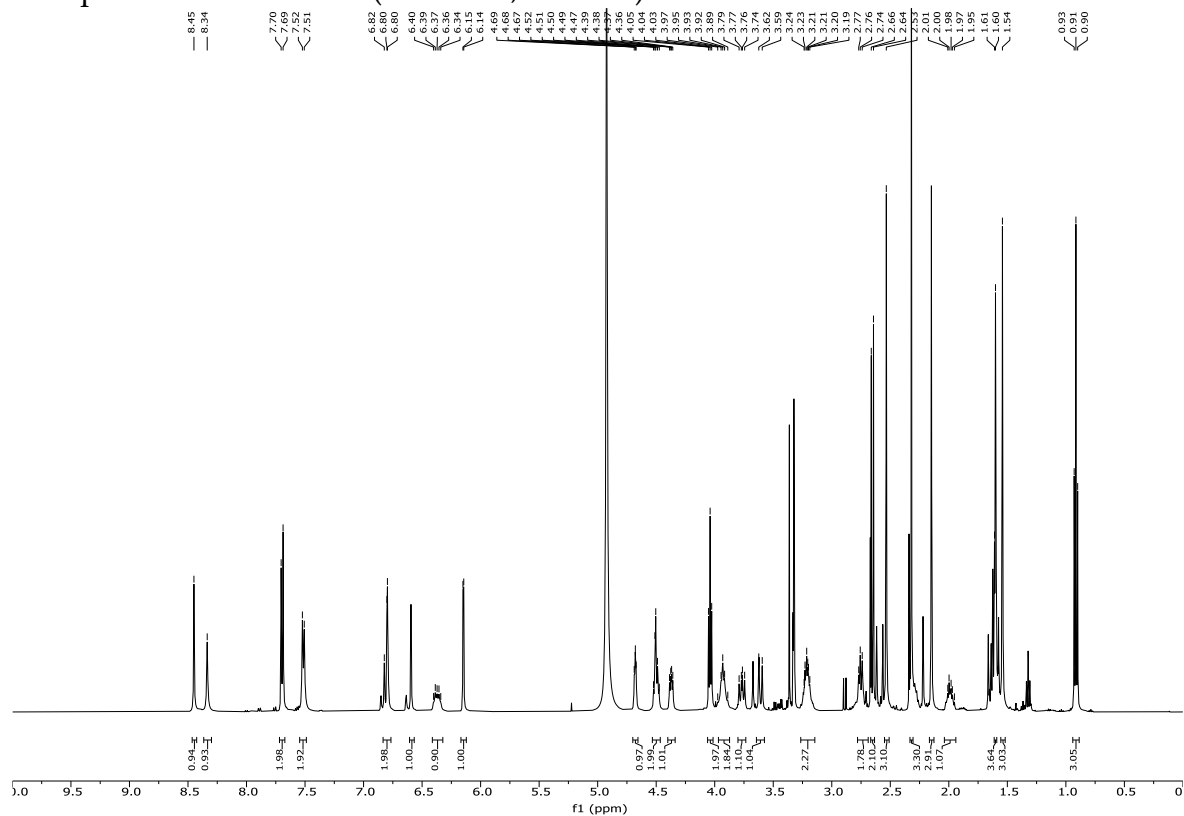

$^{13}\text{C}$  NMR (126 MHz,  $\text{CD}_3\text{OD}$ )

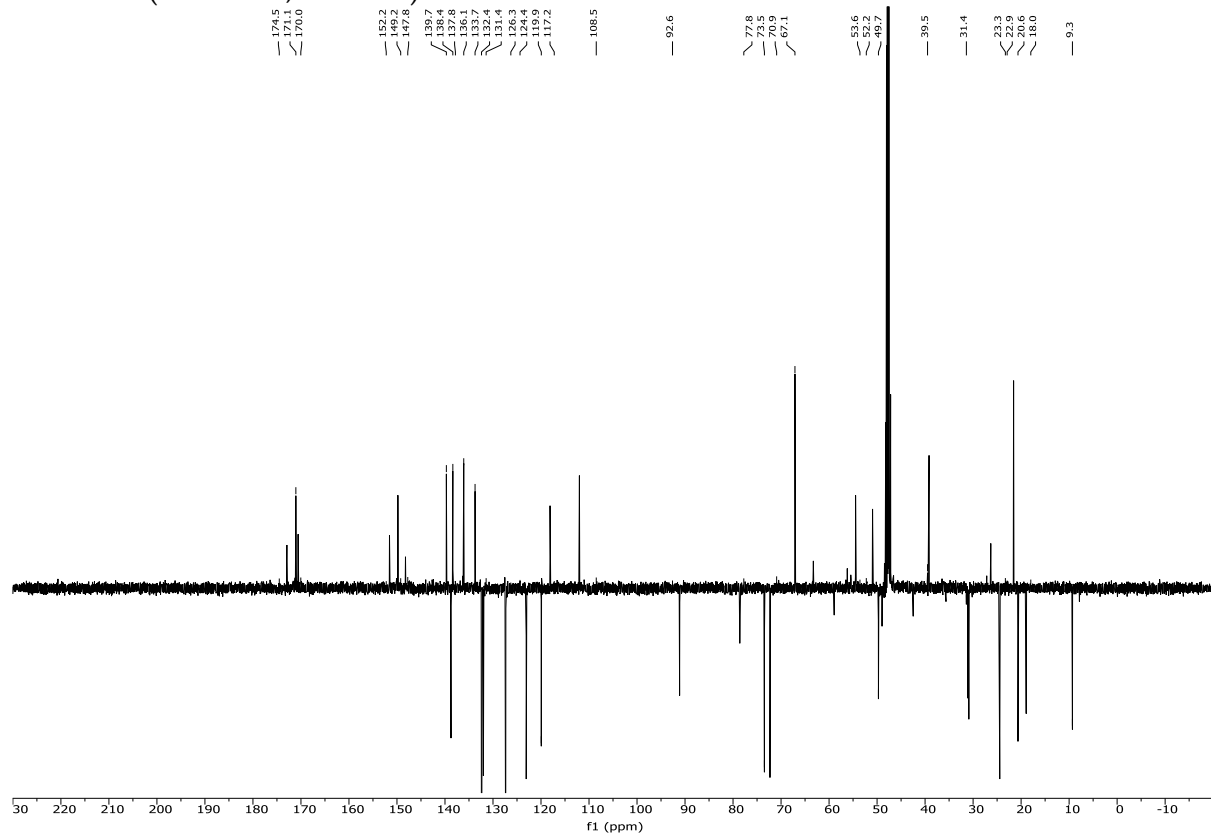



Compound **14e**  $^1\text{H}$  NMR (400 MHz,  $\text{CD}_3\text{OD}$ )

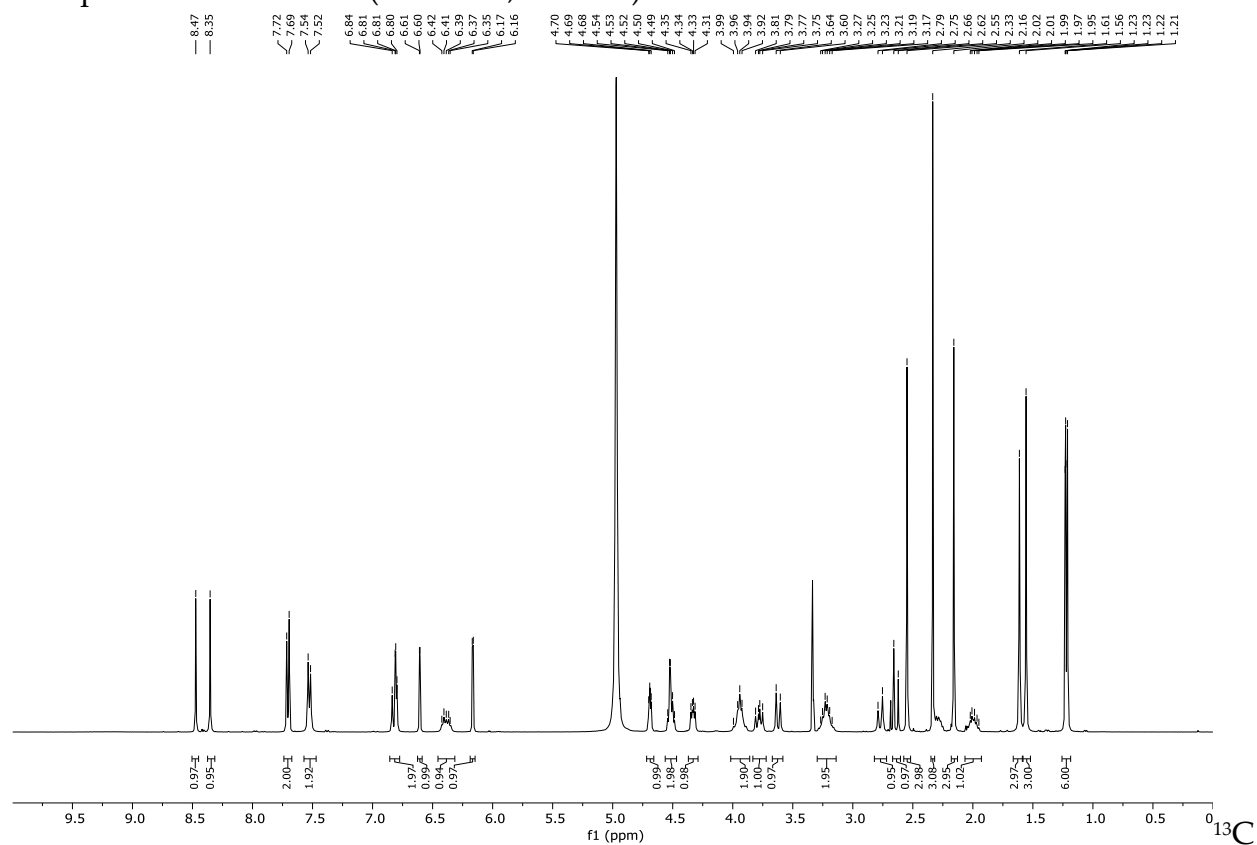

NMR (101 MHz,  $\text{CD}_3\text{OD}$ )

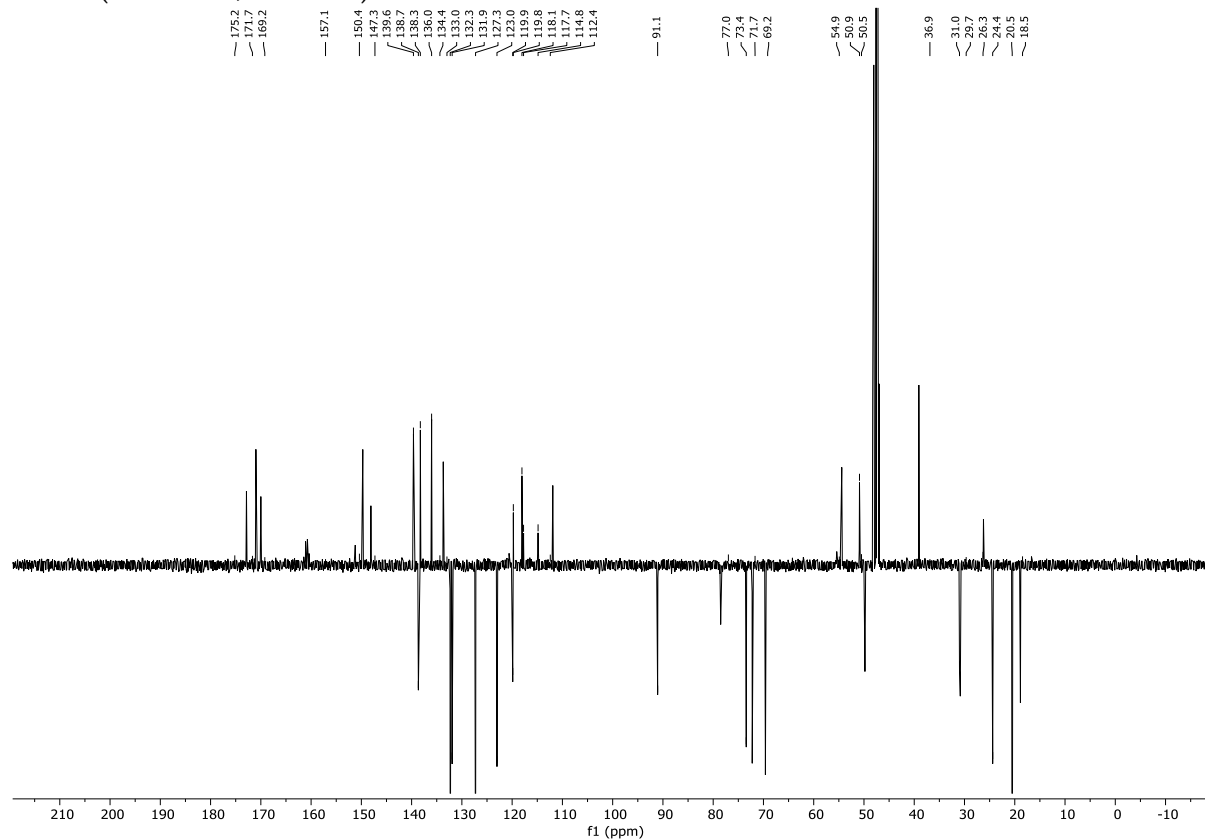

Compound **14f**  $^1\text{H}$  NMR (500 MHz,  $\text{CD}_3\text{OD}$ )

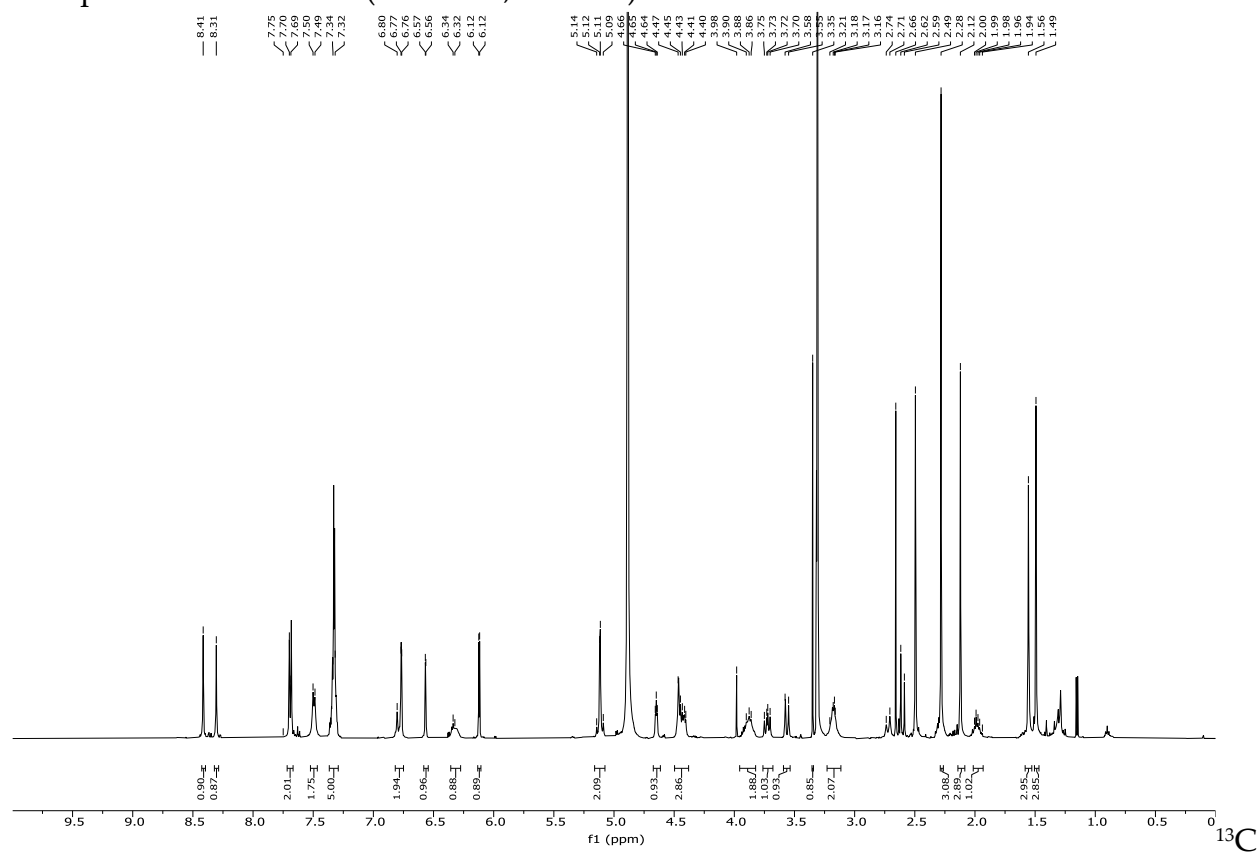

NMR (126 MHz,  $\text{CD}_3\text{OD}$ )

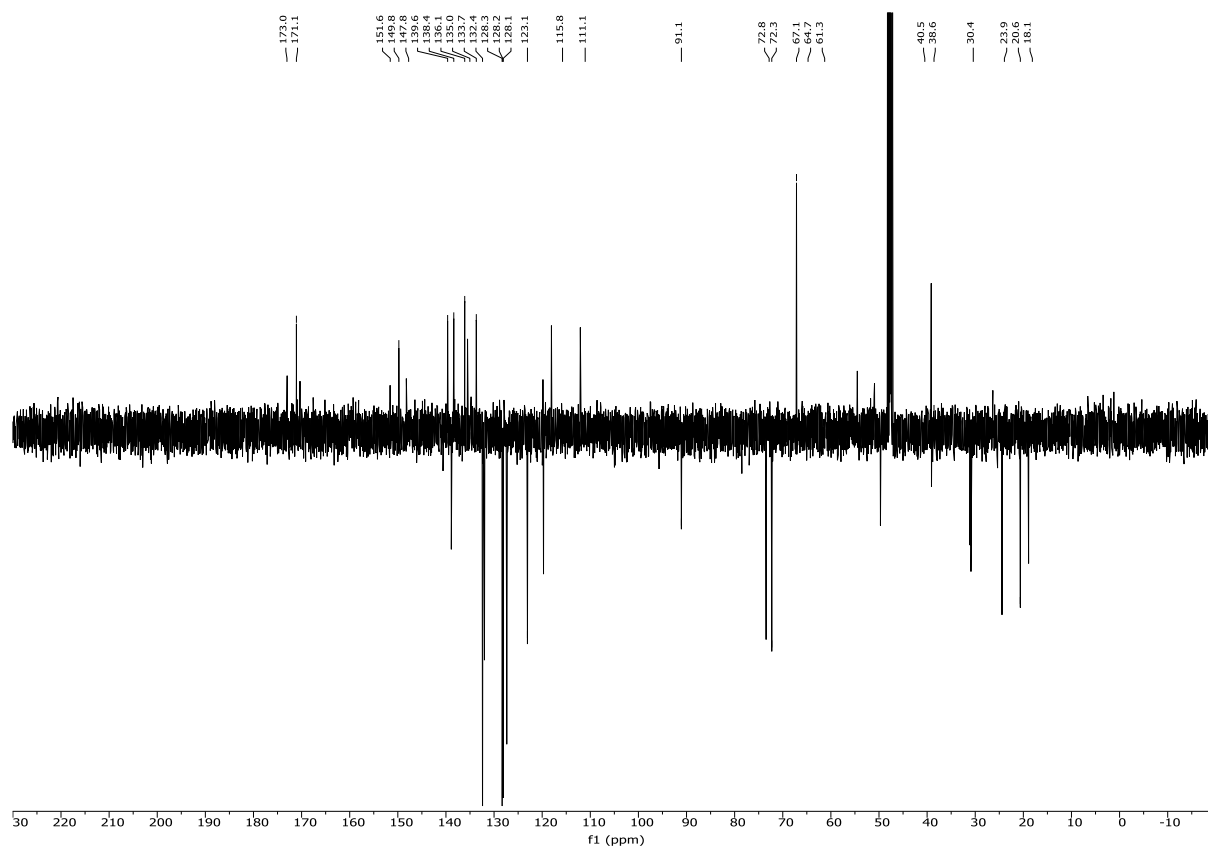

Supplement: s1 [file s1]
